# Supplementary material
Source: Royal Society of Chemistry journal article supplement (doi:10.1039/d6gc00599c)
Supplement: d6gc00599c1.pdf [file d6gc00599c1.pdf]

## Supplement Information

### **Engineering modular and tunable the overall photocatalytic generation of H<sub>2</sub>O<sub>2</sub> via atomic regulation 1D Covalent Organic Frameworks**

Machao Wang,<sup>a</sup> Kailun Yao,<sup>a</sup> Xiuyue He,<sup>a</sup> Shentong Jiang,<sup>a</sup> Zhiruo Tang,<sup>a</sup> Zhiyong Guo,<sup>\*,a</sup> Jinni Shen<sup>\*,b</sup> and Hongbing Zhan<sup>\*,a</sup>

<sup>a</sup>College of Materials Science and Engineering, Fuzhou University, Fuzhou 350108, PR China

Email: [guozhy@fzu.edu.cn](mailto:guozhy@fzu.edu.cn); [hbzhan@fzu.edu.cn](mailto:hbzhan@fzu.edu.cn)

<sup>b</sup>State Key Lab of Photocatalysis on Energy and Environment, College of Chemistry, Fuzhou University, Fuzhou 350108, PR China

E-mail: [t15067@fzu.edu.cn](mailto:t15067@fzu.edu.cn)

## Materials and Methods

**Materials:** All solvents and reagents obtained from commercial sources were used without further purification. 1,4-dioxane (99%, AR), 1,3,5-trimethylbenzene (99%, AR), ethanol (EtOH, AR), tetrahydrofuran (THF, 99.5%), acetone (99%, AR), methanol (MeOH, AR), phenol (99%, AR) and 30% H<sub>2</sub>O<sub>2</sub> stock solution were purchased from Sinopharm National Medicine Corporation. 2,3,6,7-tetrakis(4-formylphenyl)tetrathiafulvalene (TTF-4CHO, 99%), 4,4-diaminodiphenylsulfide (TAD, 99%), 4,4'-oxydiphenylamine (ODA, 99%), 4,4-diaminodiphenylmethane (MDA, 99%), potassium iodide (KI, 99%), potassium hydrogen phthalate (C<sub>8</sub>H<sub>5</sub>KO<sub>4</sub>, 99%) and Rhodamine B (RhB, AR) were obtained from Adamas-Beta.

**Characterizations and instruments:** Fourier transform infrared spectra (FT-IR) in the region 4000-400 cm<sup>-1</sup> were tested using a Nicolet iS50 spectrometer with a KBr beam splitter. Powder X-ray diffraction (PXRD) patterns were collected on a Rigaku Miniflex 600, operated at 40 kV, 30 mA using Cu-K $\alpha$  radiation ( $\lambda = 0.15416$  nm) in Bragg-Brentano geometry. Thermogravimetric analyses (TGA) were performed on NETZSCH STA449-F5 by heating the samples from 35 to 900°C under a nitrogen atmosphere with a heating rate of 10 °C/min and a gas flow rate of 20 mL/min. The <sup>13</sup>C-solidstate nuclear magnetic resonance (<sup>13</sup>C-SS-NMR) spectra of the COF were measured by using a Bruker Advance III 500 nuclear magnetic resonance spectrometer. Scanning electron microscopy (SEM, Nova NanoSEM 230) was utilized to obtain the morphology of samples. The high-resolution transmission electron microscopy (HR-TEM) images of the samples were obtained by JEM-2100 Plus (LaB6 filament) at 200 kV. Nitrogen sorption isotherms analysis was performed at 77 K using Micromeritics ASAP 2020 Plus HD88 and all the samples (over 60 mg) were outgassed at 120°C for 12 h in a dynamic vacuum before measurements. The surface areas were calculated based on the Brunauer-Emmett-Teller (BET) model between P/P<sub>0</sub> values of 0.05 and 0.3.

**Synthesis of FZU-301:** 2,3,6,7-tetrakis(4-formylphenyl)tetrathiafulvalene (6.2 mg, 0.01 mmol) and 4,4-diaminodiphenylsulfide (3.9 mg, 0.02 mmol) were packed into a Pyrex tube (L = 20 cm,  $\Phi$  = 10 mm), 0.4 mL 1,4-dioxane, 0.1 mL 6M AcOH, and 0.6 mL mesitylene were added into the Pyrex tube, the mixture was stirred and sonicated for 15 min. Then the Pyrex tube was degassed through freeze-pump-thaw cycles for three times, and flame sealed to an approximate length of 15 cm. The reaction was heated to 120°C for 5 d. After the reaction, the Pyrex tube was opened using a glass cutter, the solid was collected by filtration and washed with acetone, and then the solid was washed with tetrahydrofuran in a Soxhlet extractor for 1 day and dried under vacuum at 120°C to obtain 8.6 mg of purple-red solid (yield: 86%).

**Synthesis of FZU-302:** 2,3,6,7-tetrakis(4-formylphenyl)tetrathiafulvalene (6.2 mg, 0.01 mmol) and 4,4'-oxydiphenylamine (4 mg, 0.02 mmol) were packed into a Pyrex tube (L = 15 cm,  $\Phi$  = 10 mm), 0.4 mL 1,4-dioxane, 0.1 mL 6M AcOH, and 0.6 mL mesitylene were added into the Pyrex tube, the mixture was stirred and sonicated for 15 min. Then the Pyrex tube was degassed through freeze-pump-thaw cycles for three times, and flame sealed to an approximate length of 15 cm. The reaction was heated to 120°C for 5 d. After the reaction, the Pyrex tube was opened using a glass cutter, the solid was collected by filtration and washed with acetone, and then the solid was washed with tetrahydrofuran in a Soxhlet extractor for 1 day and dried under vacuum at 120°C to obtain 8.9 mg of purple-black solid (yield: 88%).

**Synthesis of FZU-303:** 2,3,6,7-tetrakis(4-formylphenyl)tetrathiafulvalene (6.2 mg, 0.01 mmol) and 4,4-diaminodiphenylmethane (3.9 mg, 0.02 mmol) were packed into a Pyrex tube (L = 20 cm,  $\Phi$  = 10 mm), 0.4 mL 1,4-dioxane, 0.1 mL 6M AcOH, and 0.6 mL mesitylene were added into the Pyrex tube, the mixture was stirred and sonicated for 15 min. Then the Pyrex tube was degassed through freeze-pump-thaw cycles for three times, and flame sealed to an approximate length of 15 cm. The reaction was heated to 120°C for 5 d. After the reaction, the Pyrex tube was opened using a glass cutter, the solid was collected by filtration and washed with acetone, and

then the solid was washed with tetrahydrofuran in a Soxhlet extractor for 1 day and dried under vacuum at 120°C to obtain 8.5 mg of purple-red solid (yield: 84%).

**Photoelectrochemical measurements:** All electrochemical measurements (photocurrent, Mott Schottky and EIS) were made in 0.2 M sodium sulfate solution (pH = 6.8) through the traditional three electrode system in the INTERFACE 1000E electrochemical workstation<sup>[1]</sup>. The working electrode is ITO glass plate coated with catalyst slurry, the counter electrode is platinum foil, and saturated Ag/AgCl as reference electrode. Mott Schottky plots were measured at alternating current (AC) frequencies of 1000 Hz, 1500 Hz and 2000 Hz<sup>[2]</sup>.

**Preparation of working electrode:** 2 mg catalyst, 1 mL ethanol and 10  $\mu$ L Nafion D-520 were mixed and ultrasound for 30 min. Then, 200  $\mu$ L slurry solution was deposited evenly on the ITO glass plate ( $1 \times 2$  cm<sup>2</sup>) and left to dry in the air.

**Photocatalytic reactions:** In a typical experiment, the photosynthesis of H<sub>2</sub>O<sub>2</sub> was carried out in 25 mL glass tube containing 5 mg COF and 10 mL deionized water at 25°C under O<sub>2</sub> atmosphere. Then, the solution was irradiated with a xenon lamp source (PLS-SXE300D, Beijing Perfect Light). The H<sub>2</sub>O<sub>2</sub> content in the solution was evaluated every 15 min.

**H<sub>2</sub>O<sub>2</sub> detection methods (iodometry):** The amount of H<sub>2</sub>O<sub>2</sub> was analyzed by iodometry. 1 mL 0.1 mol L<sup>-1</sup> potassium hydrogen phthalate (C<sub>8</sub>H<sub>5</sub>KO<sub>4</sub>) aqueous solution and 1 mL 0.4 mol L<sup>-1</sup> potassium iodide (KI) potassium hydrogen phthalate (C<sub>8</sub>H<sub>5</sub>KO<sub>4</sub>) aqueous solution and 1 mL 0.4 mol L<sup>-1</sup> potassium iodide (KI) iodine ions (I<sup>-</sup>) under acidic conditions to generate triiodide ions (I<sub>3</sub><sup>-</sup>), which have strong absorption near 350 nm. The absorbance of I<sub>3</sub><sup>-</sup> at 350 nm is measured by ultraviolet spectrophotometer (UH5300). Therefore, the amount of H<sub>2</sub>O<sub>2</sub> generated by each reaction can be calculated.

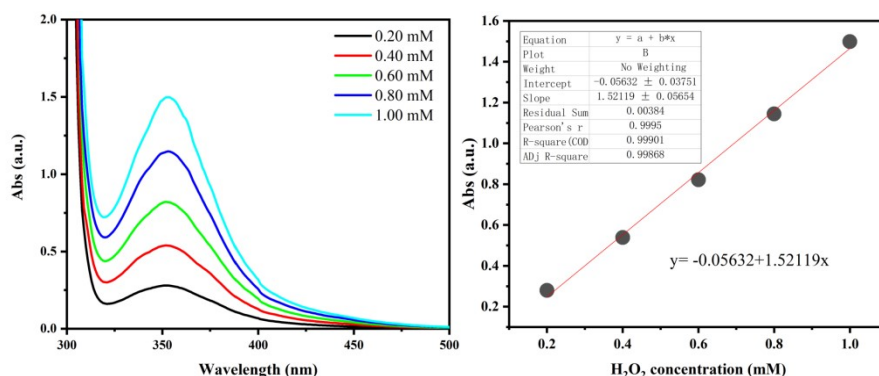

**In-situ Fourier transform infrared spectrometer (FT-IR) analysis:** In-situ Fourier transform infrared spectrometry was performed on a Nicolet iS-50 instrument. The sample was filled into an in-situ IR cell, and  $O_2$  and  $H_2O$  vapors were introduced into the cell and fiber source (FX300, Beijing Perfect Light Technology Co., Ltd., Beijing, China) through the  $CaF_2$  window of the cell. Before the measurement, the samples were degassed at 423 K for 4 h. The baseline was obtained before the sample reached  $O_2$  adsorption equilibrium within 1 h<sup>[3]</sup>.

**EPR measurements:** Electron paramagnetic spectroscopy (EPR) was measured on a Bruker EMX plus model spectrometer. The generation of reactive species including photogenerated electrons ( $e^-$ ), superoxide radicals ( $\cdot O_2^-$ ), and hydroxyl radicals ( $\cdot OH$ ) by COFs during the  $H_2O_2$  photosynthesis process were investigated by EPR measurements. 5,5-dimethyl-1-pyrroline N-oxide (DMPO) and 4-hydroxy-2,2,6,6-tetramethylpiperidinyloxy (TEMPO) were used as the spin trapping agents. 1  $\mu L$  DMPO was added into 50  $\mu L$  sample suspension (1 g/L in DMSO) for the detection of  $\cdot O_2^-$ . 1  $\mu L$  DMPO was added into 100  $\mu L$  sample suspension (1 g/L in water) for the detection of  $\cdot OH$ . Additionally, 1  $\mu L$  TEMPOL (2.5 mM) was added into 200  $\mu L$  sample suspension (1 g/L in water) for the detection of  $e^-$ . The mixed suspensions were placed into the quartz capillary tube and then irradiated by visible-light to detect the signal intensity of the spin capture adduct.

**Room-temperature photoluminescence (PL) measurement:** PL measurement was measured on FLS1000 fluorescence spectrophotometer. The solid sample is placed on the substrate. A monochromatic light source (e.g., a 450 nm laser diode) is used for steady-state excitation. The emitted PL signal from the sample is collected and directed into a spectrometer. It is then dispersed and detected by a charge-coupled device (CCD) detector. Finally, the spectrum is acquired and plotted as intensity versus wavelength (nm). This provides information on the optical bandgap and impurity states.

**Variable-temperature photoluminescence (PL) spectroscopy:** The test equipment is FLS1000 fluorescence spectrophotometer. Variable-temperature photoluminescence (PL) spectroscopy is performed by mounting the sample in a closed-cycle cryostat or a temperature-controlled stage. The sample temperature is precisely varied, typically from 80 K to 300 K or higher. At each stabilized temperature, the sample is excited by a laser, and the emitted PL signal is collected and analyzed by a spectrometer equipped with a CCD or InGaAs detector. This technique maps the evolution of emission peak energy, intensity, and linewidth with temperature, providing critical insights into exciton dynamics, defect states, and carrier recombination mechanisms.

**Time-resolved photoluminescence (TRPL) measures the fluorescence:** The test equipment is FLS1000 fluorescence spectrophotometer. TRPL measures the fluorescence decay lifetime. A pulsed laser (e.g., picosecond or nanosecond pulses) excites the sample. The subsequent emission decay is detected by a fast-response photodetector, such as a photomultiplier tube. The time-dependent intensity is recorded using time-correlated single-photon counting (TCSPC) or a streak camera system. The decay curve is then fitted to exponential models, extracting lifetime constants ( $\tau$ ) on the nanosecond to microsecond scale. This reveals dynamics of radiative recombination, energy transfer, and quenching processes.

**The AQY and SCC measurement:** The photocatalytic reaction was carried out in pure deionized water (100 mL) and catalyst (50 mg) in a photocatalytic reactor. After sonication and bubbling, the bottle was irradiated by a Xe lamp at 420-800 nm (Beijing Perfect Light Technology Co., LTD., Beijing, China).

The apparent quantum yield (AQY) of the photocatalyst was measured under the irradiation of a 300 W Xe lamp with a 420 nm band-pass filter. The active area of the reactor is about 11.34 cm<sup>2</sup>. Use PL-MW2000 optical radiometer to take the average value of monochromatic light intensity at three representative points. Therefore, the light intensity at 420 nm is calculated as 20.3 mW cm<sup>-2</sup>. AQY is calculated as follows:

$$AQY = \frac{(\text{Number of produced } H_2O_2 \text{ molecules}) \times 2}{\text{Number of incident photons}} \times 100\%$$

$$AQY = \frac{(M_{H_2O_2} \times N_A \times h \times c)}{S \times P \times T \times \lambda} \times 100$$

**M** = yield of H<sub>2</sub>O<sub>2</sub> (mol);

**NA (Avogadro constant)** = 6.02 × 10<sup>23</sup> mol<sup>-1</sup>;

**h (Planck constant)** = 6.626 × 10<sup>-34</sup> J·s;

**c (Speed of light)** = 3 × 10<sup>8</sup> m/s;

**S = Irradiation area (cm<sup>2</sup>)** = 11.5 cm<sup>2</sup>;

**P = the intensity of irradiation light (W / cm<sup>2</sup>)** = 59.6 mW / cm<sup>2</sup> (420 nm);

**T = the photoreaction time (s)** = 3600 s;

**λ = the wavelength of the monochromatic light (nm)** = 420 × 10<sup>-9</sup> m;

**The SCC efficiency was calculated by the following equation:**

$$SCC \text{ efficiency (\%)} = \frac{[\Delta G \text{ for } H_2O_2 \text{ generation (J mol}^{-1}) \times [H_2O_2 \text{ formed (mol)}]}{[\text{Total input power (W)} \times [\text{Reaction time (s)}]} \times 100$$

where ΔG = 117 kJ mol<sup>-1</sup>, the irradiated area is 11.5 cm<sup>2</sup>, the total input energy was therefore 1.15 W.

**Photocatalytic evolution of •O<sub>2</sub>•:** NBT (nitro blue tetrazolium) method. 15 mg catalysts were suspended in 50 mL NBT aqueous solution with a concentration of 2.0 × 10<sup>-5</sup> M. The light source was consistent with the above light source used in the photocatalytic reaction, and the overall experimental photocatalyst was separated with

a 0.22  $\mu\text{m}$  filter. The absorbance of the supernatant was measured on a spectrophotometer. The generation of  $\cdot\text{O}_2^-$  was determined by the degradation of NBT, which was detected by the absorbance change at the wavelength of 259 nm<sup>[3]</sup>.

**Detect  $^1\text{O}_2$  by DPBF :** 1 mg COFs (1D TTF COFs, respectively), 4 mL water, and 4 mL DPBF solution (0.05 mM, DMF as solvent) were mixed and dispersed in a quartz tube. The quartz tube was illuminated by 300 W xenon lamp and cooled by circulating water. After irradiation, the supernatant was collected by centrifugation, and the UV-Vis spectra were collected<sup>[4]</sup>.

**Transient absorption (TA) measurements:** Femtosecond (fs) transient absorption spectroscopy measurements were investigated by a Pharos ultrafast Yb: KGW laser (Light Conversion) with a regenerative amplifier, which produces IR pulses (10 W) centered at 1030 nm wavelength (200 kHz, pulse width < 290 fs). A portion of this beam (80%) was sent through an optical parametric amplifier (OPA, ORPHEUS, Light Conversion) to generate 370 nm pump beam for the excitation (pulse duration  $\sim$ 70 fs), and the residual was used as the probe beam. The resulting pump and probe pulses were directed into a TA spectrometer (Harpia, Light Conversion). Both the pump and probe pulses were sent into an optical bench. The probe pulse was focused into a sapphire crystal, generating a continuum white light as the probe light. The frequency of the pump pulse was reduced to 95 Hz, using a chopper, and the absorption with and without pumping light was measured and compared. For TA measurements in the time domain of 100 ps, a time delay of the probe pulse with respect to the pump pulse was regulated by a computer-controlled optical delay stage. Pump and probe pulses were focused and overlapped on the sample plane, which was housed in a 1 mm cuvette. The transmitting white-light probe pulses were directed into a photodiode array detector (Kymera, Andor). The resulting absorption differences were calibrated and analyzed using software (Harpia service app, Light Conversion). Samples with an optical absorbance of 3.0 in  $\text{H}_2\text{O}$  (3 mL) and ethylene glycol (0.2 mL) were used<sup>[5]</sup>.

**DFT calculations:** All density functional theory (DFT) calculations were performed using the Vienna Ab initio Simulation Package (VASP).<sup>[6,7]</sup> The exchange-correlation interactions were treated within the generalized gradient approximation (GGA) using the revised Perdew–Burke–Ernzerhof (PBE) functional.<sup>[8]</sup> The projector-augmented wave (PAW) method<sup>[9]</sup> was employed to describe electron-ion interactions, and a plane-wave basis set with an energy cutoff of 500 eV was used. Van der Waals interactions were accounted for using Grimme's DFT-D3 empirical dispersion correction.<sup>[10]</sup> The Brillouin zone was sampled with a  $\Gamma$ -centered  $1 \times 5 \times 1$  k-point mesh. All atomic positions were fully relaxed until the Hellmann-Feynman forces on each atom were less than  $0.05 \text{ eV} \cdot \text{\AA}^{-1}$  and the energy difference between successive electronic steps were below  $10^{-6} \text{ eV}$ . A vacuum layer of at least 20  $\text{\AA}$  was added along the non-periodic direction to eliminate interactions between periodic images. Bader charge analysis was performed based on the calculated electron density to evaluate atomic charges.<sup>[11]</sup>

The Gibbs free energy change ( $\Delta G$ ) for each chemical reaction was calculated using the equation  $\Delta G = \Delta E_{\text{DFT}} + \Delta \text{ZPE} - T\Delta S$ , where  $\Delta E_{\text{DFT}}$ ,  $\Delta \text{ZPE}$ ,  $T$ , and  $\Delta S$  represent the change in DFT-calculated total energy, the change in zero-point energy, the temperature (298.15 K), and the change in entropy, respectively.

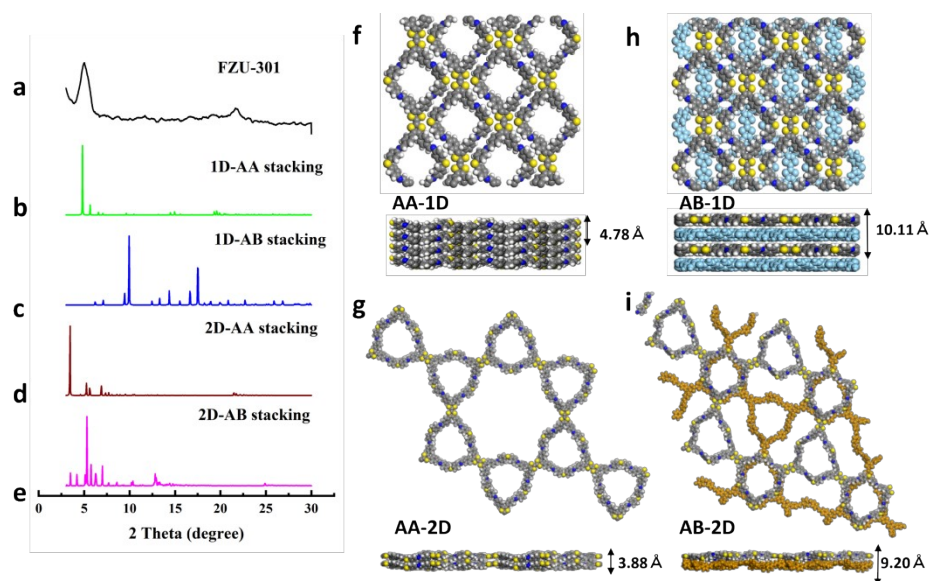

**Figure S1.** (a) Experimentally PXR D pattern, simulated PXR D patterns for (b) AA-1D structure, (c) AB-1D structure, (d) AA-2D structure, (e) AB-2D structure. Those structures with their unit cell parameters of AA-1D (f), AB-1D (g), AA-2D (h), and AB-2D (i). All the data were contributed by FZU-301. The simulated PXR D pattern of AA-1D structure shows a high similarity with the experimental results.

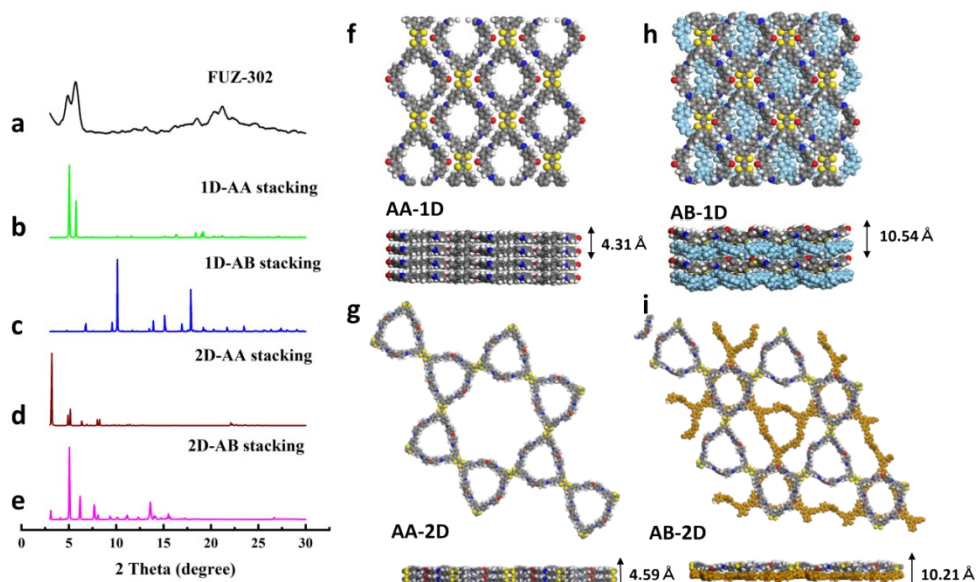

**Figure S2.** (a) Experimentally PXR D pattern, simulated PXR D patterns for (b) AA-1D structure, (c) AB-1D structure, (d) AA-2D structure, (e) AB-2D structure. Those structures with their unit cell parameters of AA-1D (f), AB-1D (g), AA-2D (h), and AB-2D (i). All the data were contributed by FZU-302. The simulated PXR D pattern

of AA-1D structure shows a high similarity with the experimental results.

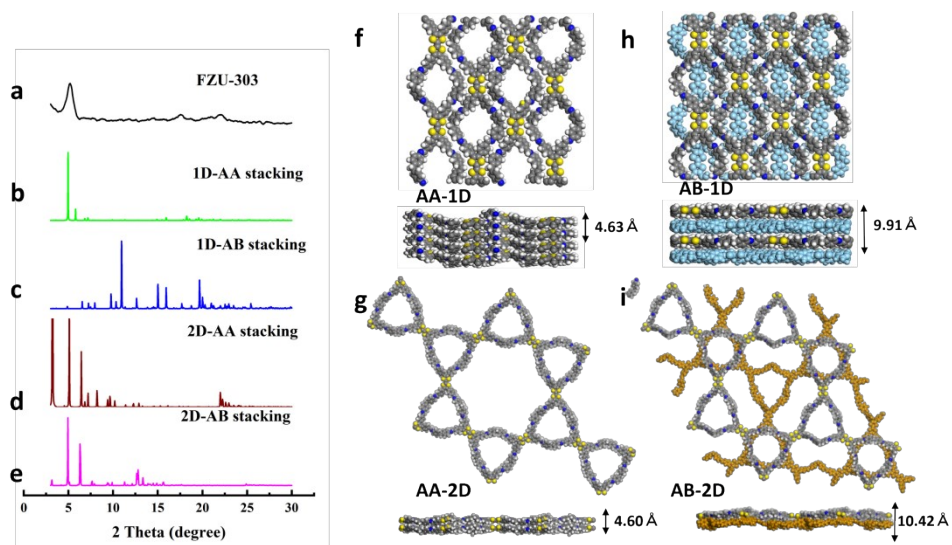

**Figure S3.** (a) Experimentally PXR D pattern, simulated PXR D patterns for (b) AA-1D structure, (c) AB-1D structure, (d) AA-2D structure, (e) AB-2D structure. Those structures with their unit cell parameters of AA-1D (f), AB-1D (g), AA-2D (h), and AB-2D (i). All the data were contributed by 1D TTF COF-3. The simulated PXR D pattern of AA-1D structure shows a high similarity with the experimental results.

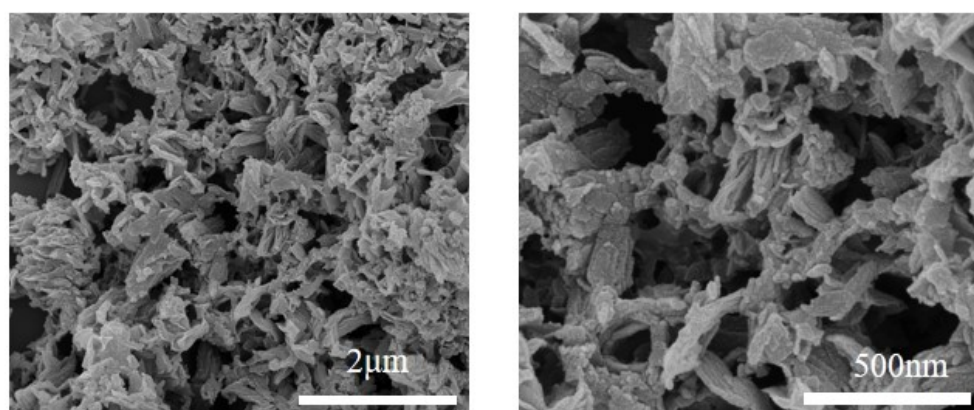

**Figure S4.** SEM images of FZU-302.

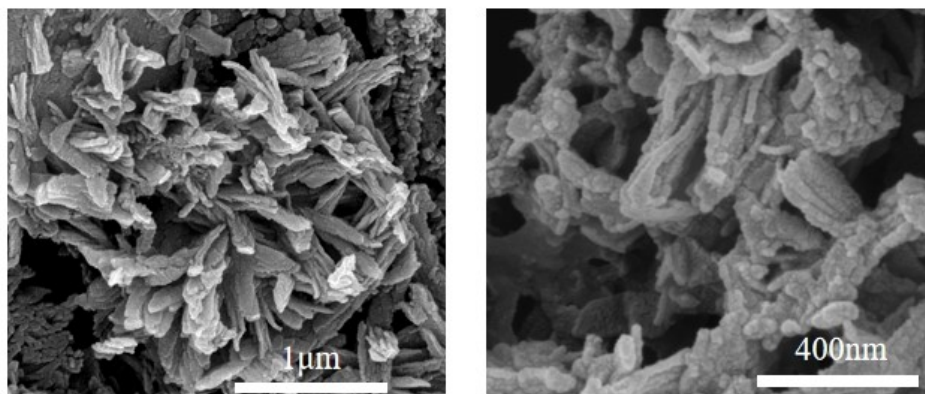

**Figure S5.** SEM images of FZU-303.

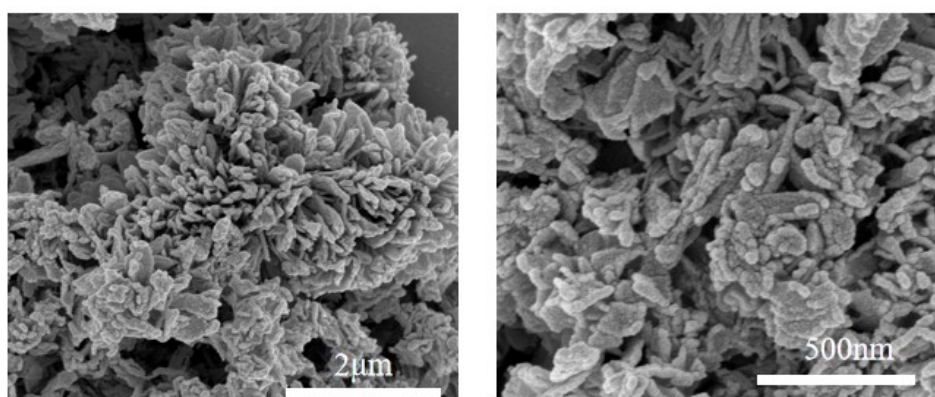

**Figure S6.** SEM images of FZU-301.

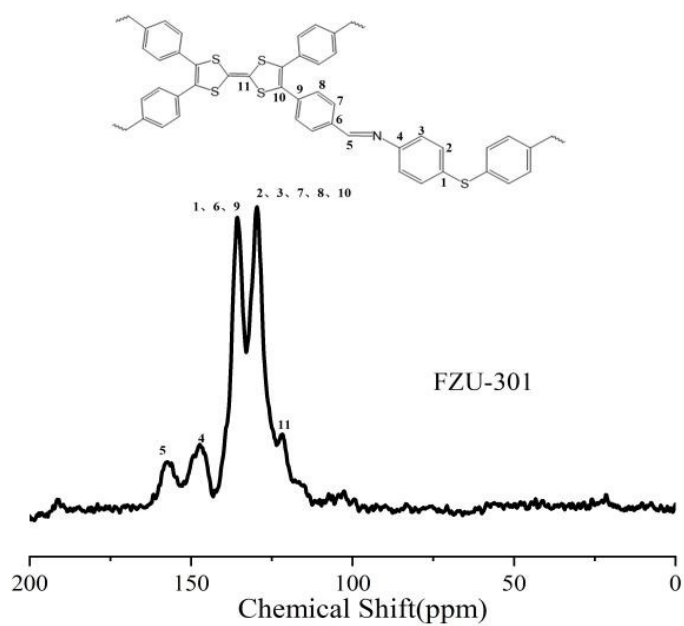

**Figure S7.**  $^{13}\text{C}$  ssNMR spectrum of FZU-301.

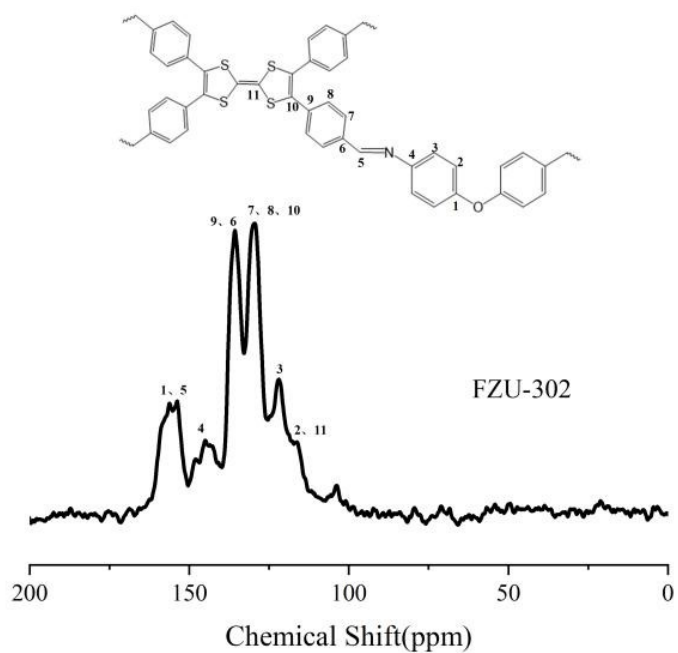

**Figure S8.**  $^{13}\text{C}$  ssNMR spectrum of FZU-302.

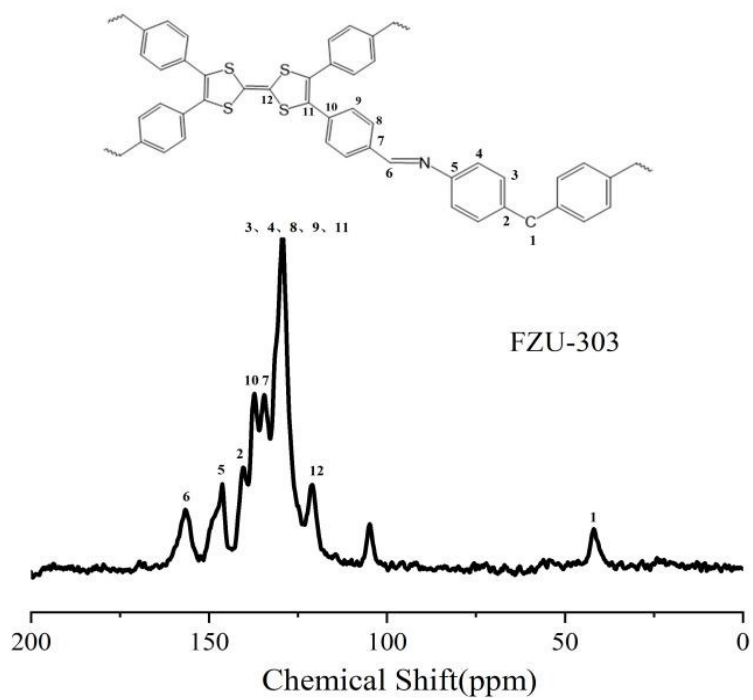

**Figure S9.**  $^{13}\text{C}$  ssNMR spectrum of FZU-303.

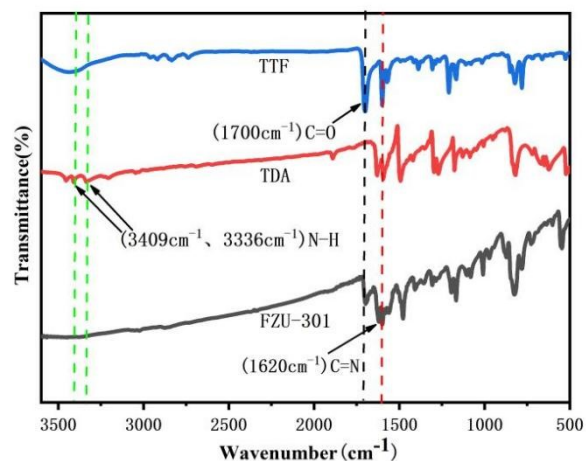

**Figure S10.** The FT-IR spectra of FZU-301.

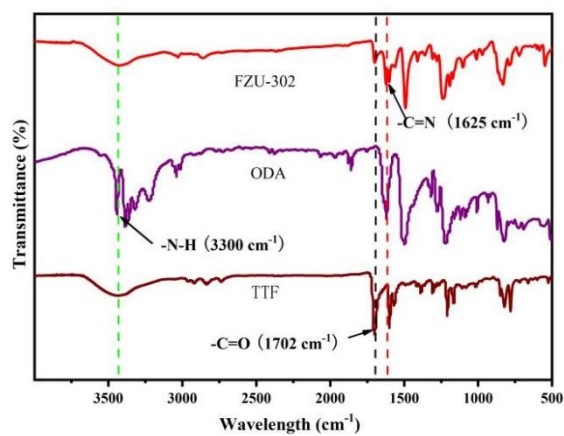

**Figure S11.** The FT-IR spectra of FZU-302.

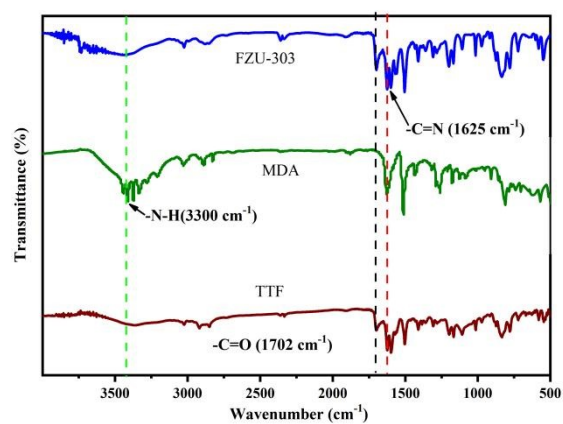

**Figure S12.** The FT-IR spectra of FZU-303.

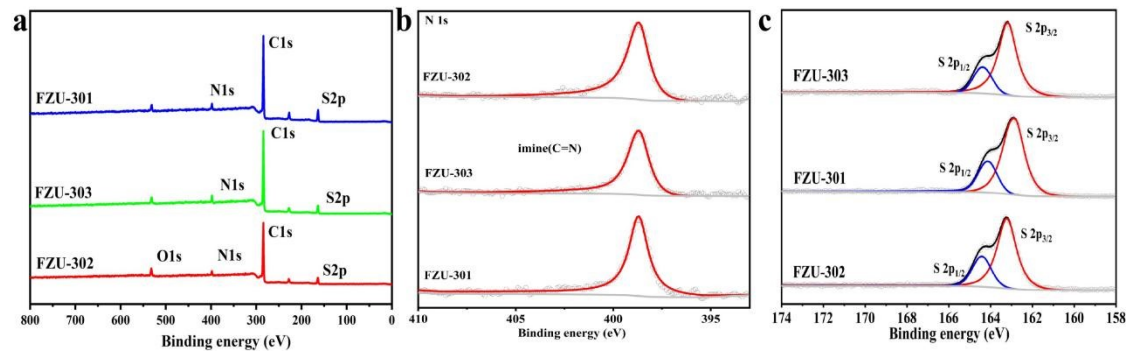

**Figure S13.** (a) Total XPS spectra; (b) N 1s; (c) S 2p.

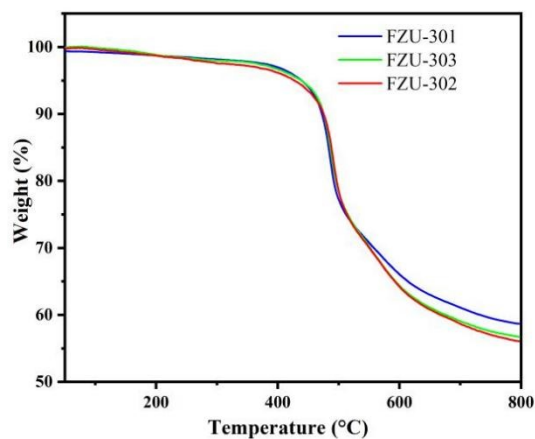

**Figure S14.** TGA curves of COFs under  $N_2$  atmosphere. All of the three COFs showed excellent thermal stability.

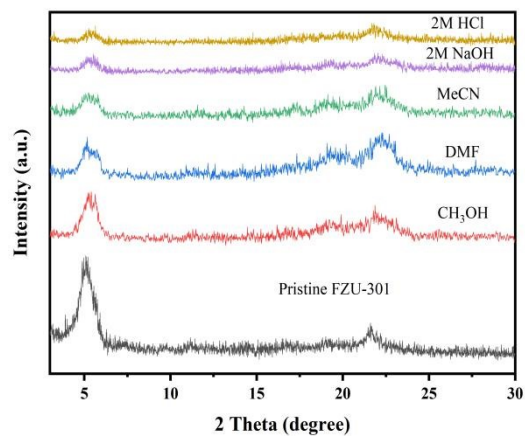

**Figure S15.** The PXRD curves of FZU-301 after treatment in different media for 5 days.

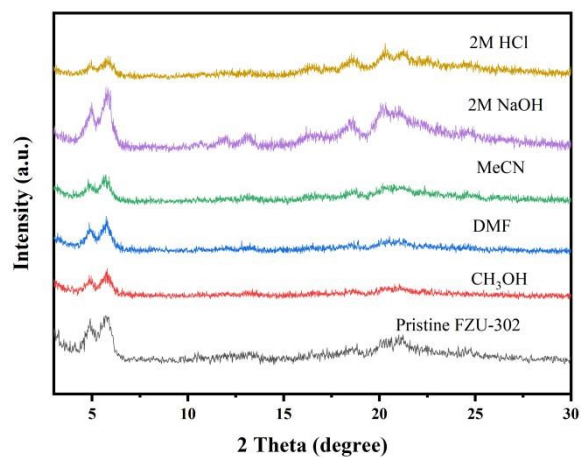

**Figure S16.** The PXRD curves of FZU-302 after treatment in different media for 5 days.

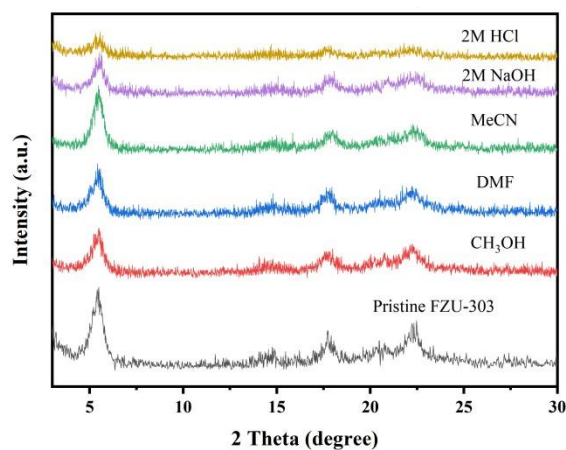

**Figure S17.** The PXRD curves of FZU-303 after treatment in different media for 5 days.

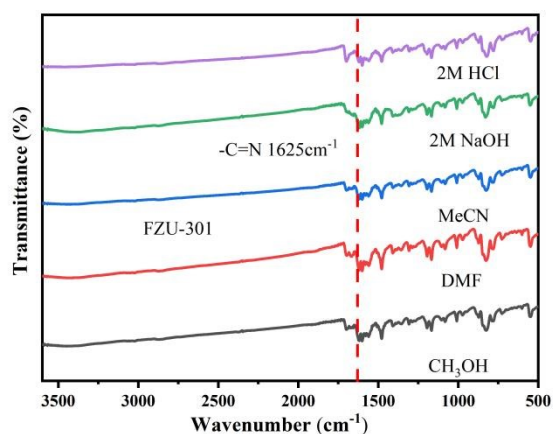

**Figure S18.** FT-IR patterns of FZU-301 after treatment in different media for 5 days.

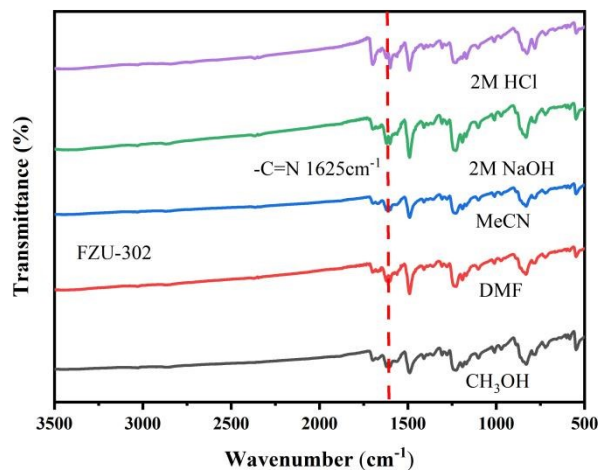

**Figure S19.** FT-IR patterns of FZU-302 after treatment in different media for 5 days.

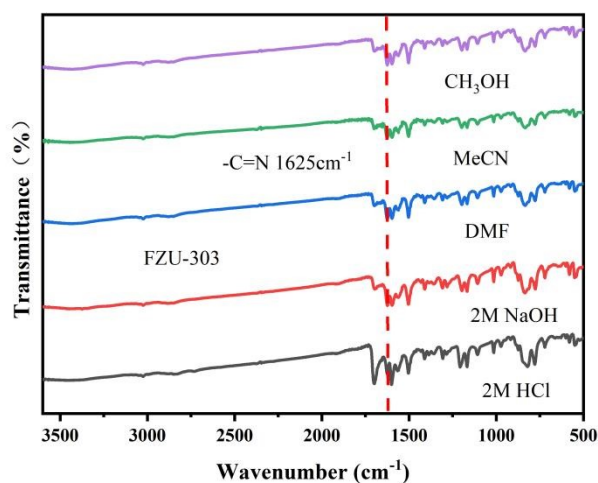

**Figure S20.** FT-IR patterns of FZU-303 after treatment in different media for 5 days.

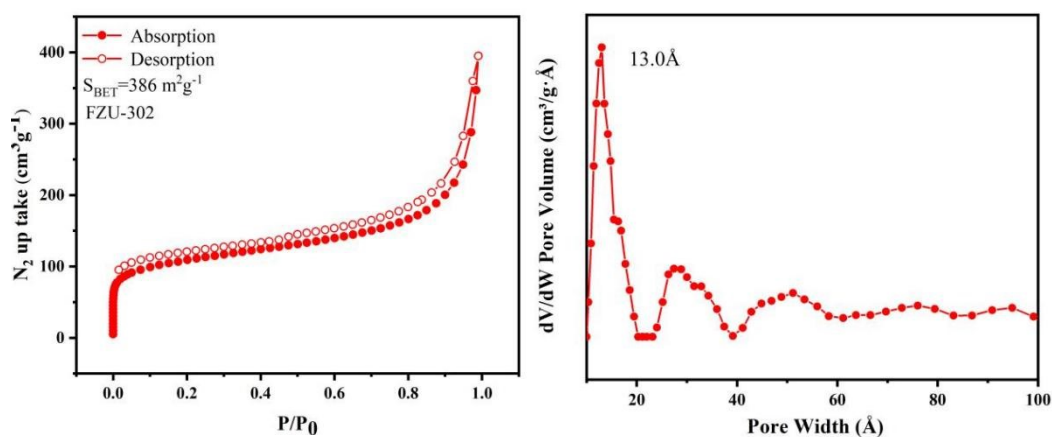

**Figure S21.**  $\text{N}_2$  adsorption-desorption isotherms and pore size distribution for FZU-302.

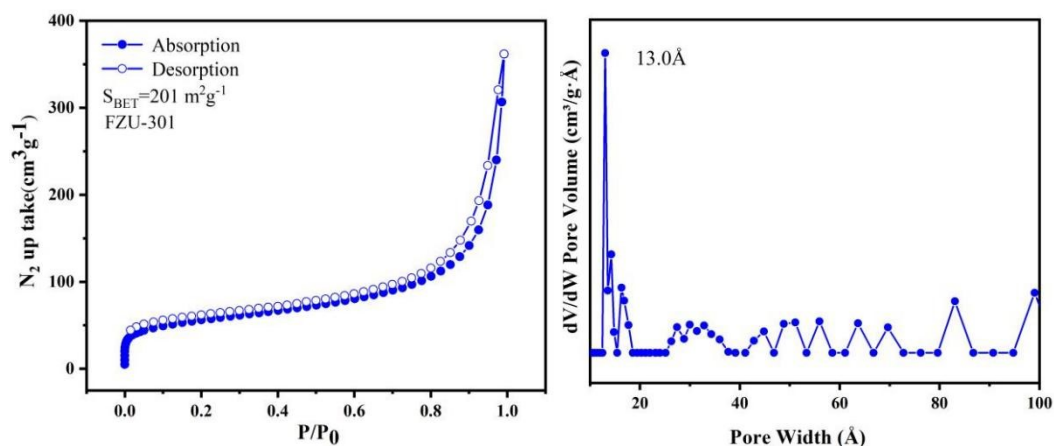

**Figure S22.** N<sub>2</sub> adsorption-desorption isotherms and pore size distribution for FZU-301.

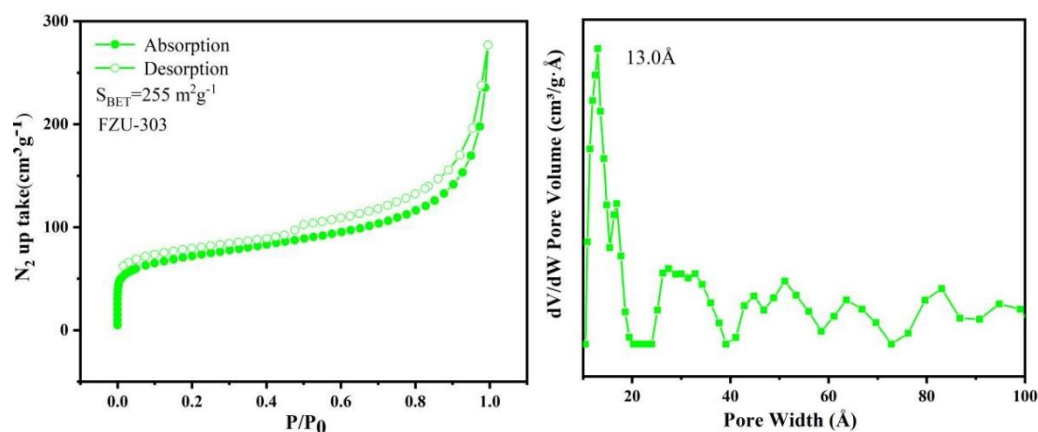

**Figure S23.** N<sub>2</sub> adsorption-desorption isotherms and pore size distribution for FZU-303.

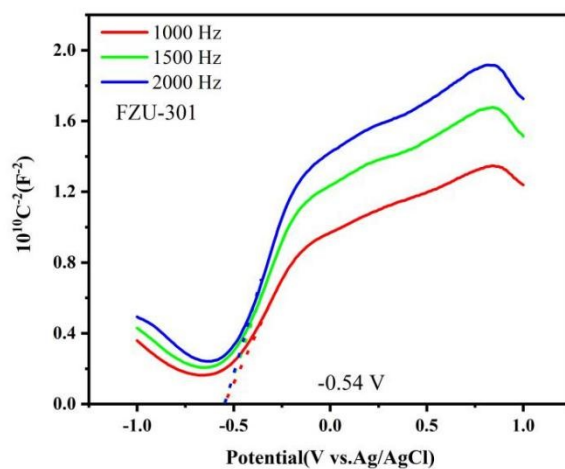

**Figure S24.** Mott-Schottky plots of FZU-301.

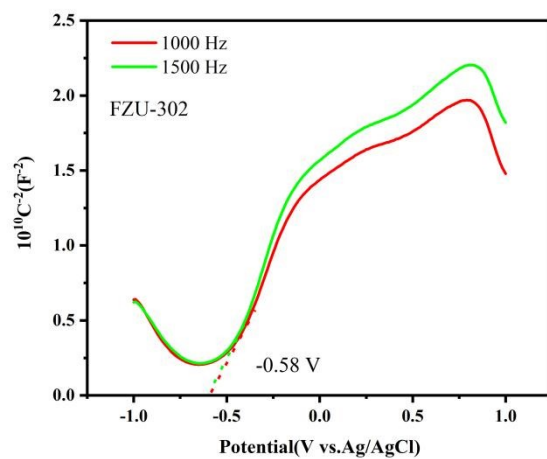

Figure S25. Mott-Schottky plots of FZU-302.

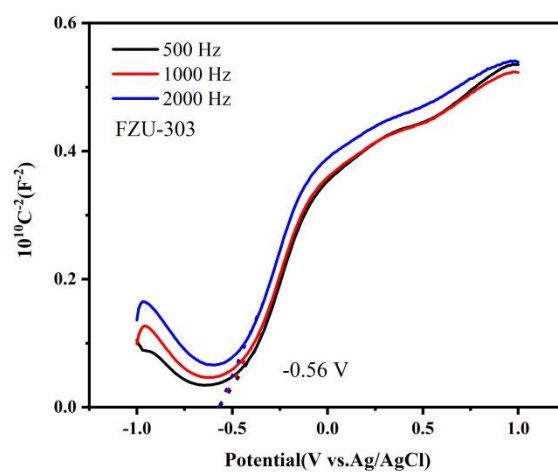

Figure S26. Mott-Schottky plots of FZU-303.

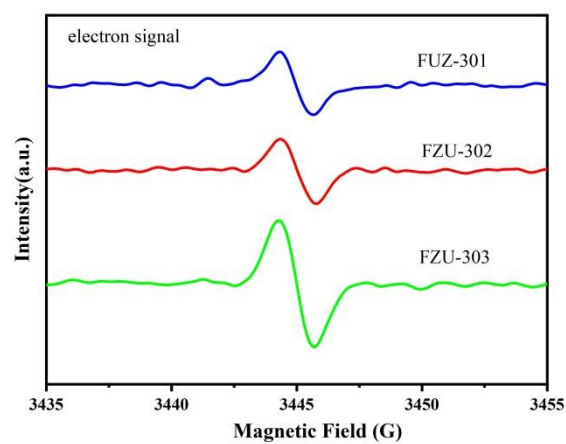

Figure S27. EPR spectra of 1D COFs under visible light.

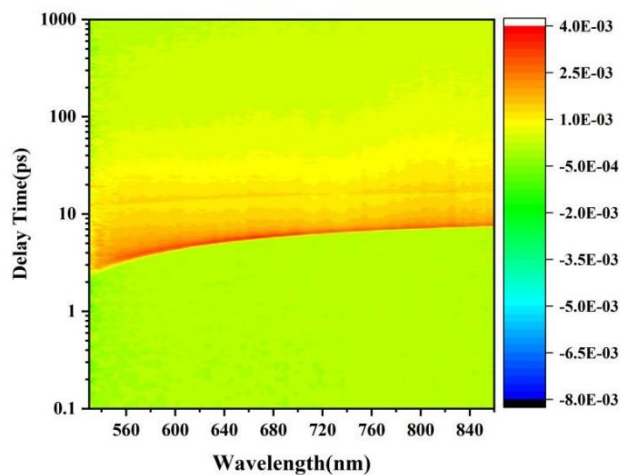

**Figure S28.** fs-TAS data maps of FZU-302 with 400 nm excitation.

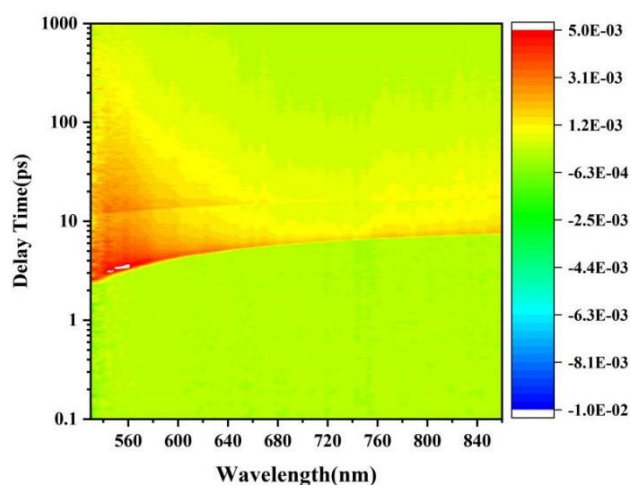

**Figure S29.** fs-TAS data maps of FZU-303 with 400 nm excitation.

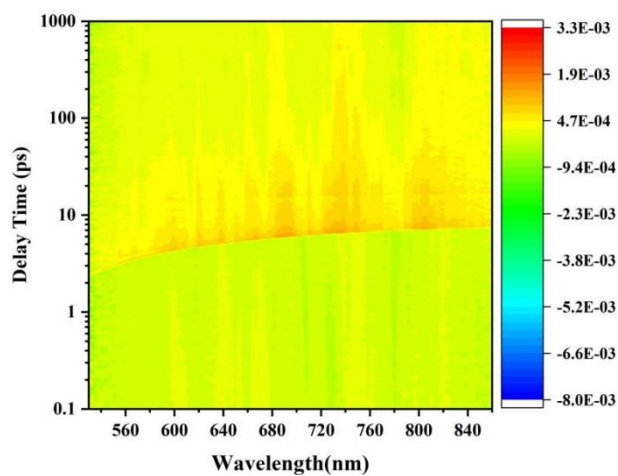

**Figure S30.** fs-TAS data maps of FZU-301 with 400 nm excitation.

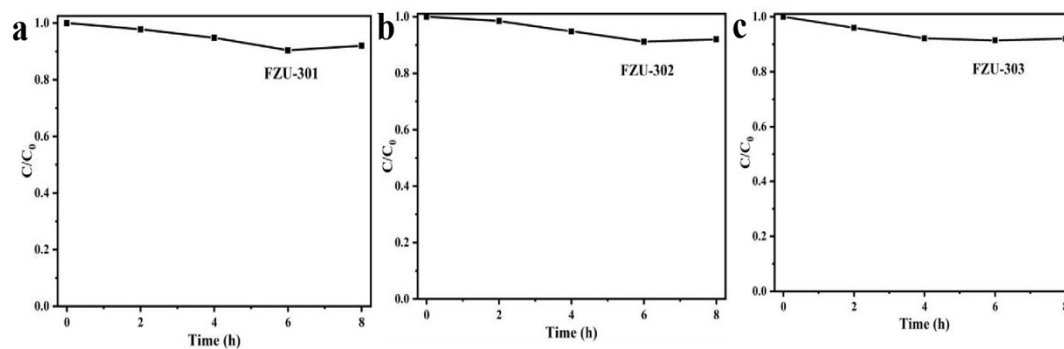

**Figure S31.** Photostability of H<sub>2</sub>O<sub>2</sub> aqueous solution containing 1D COFs under N<sub>2</sub> atmosphere. The initial H<sub>2</sub>O<sub>2</sub> concentration was 1 mM.

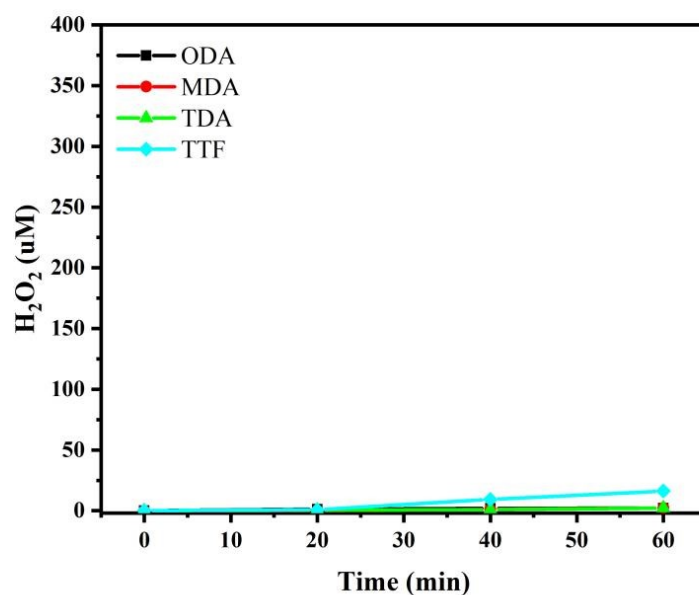

**Figure S32.** Photocatalytic H<sub>2</sub>O<sub>2</sub> yield by the monomers of COFs (Reaction condition: 5 mg catalyst in 10 mL pure water,  $\lambda > 420$  nm 300 W Xe lamp).

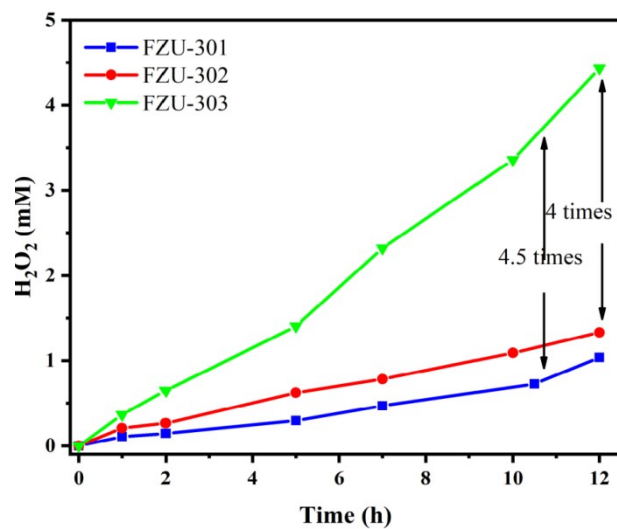

**Figure S33.** Long time H<sub>2</sub>O<sub>2</sub> accumulation generated by 1D COFs photocatalysts.

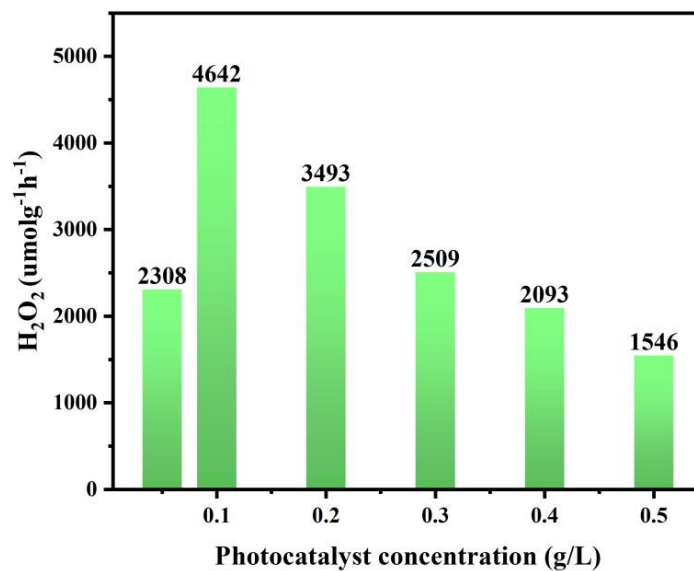

**Figure S34.** Photocatalytic H<sub>2</sub>O<sub>2</sub> yield of FZU-303 with different catalyst concentrations.

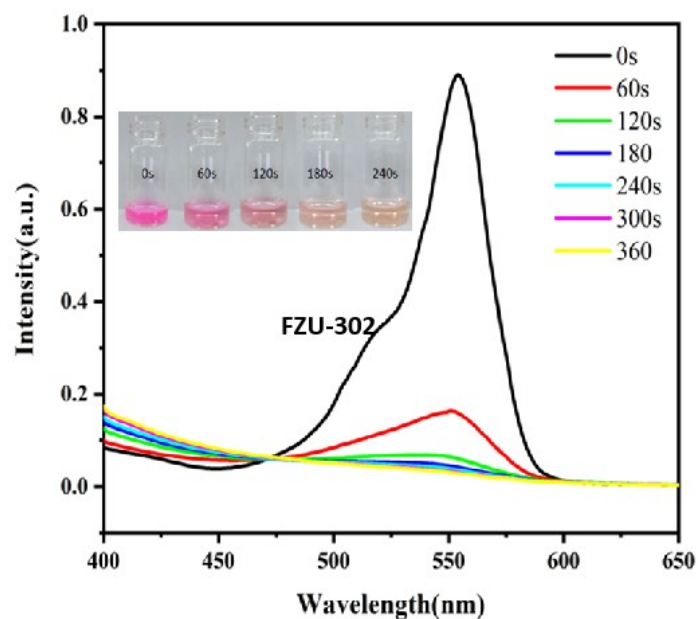

**Figure S35.** In-situ UV-vis spectra of waste water containing RhB (10 mg/L) degraded with the as-synthesized  $\text{H}_2\text{O}_2$  solution that photocatalyzed by FZU-302.

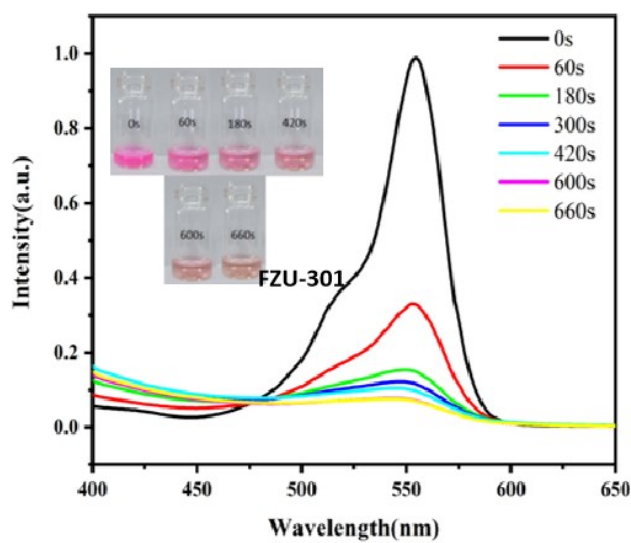

**Figure S36.** In-situ UV-vis spectra of waste water containing RhB (10 mg/L) degraded with the as-synthesized  $\text{H}_2\text{O}_2$  solution that photocatalyzed by FZU-301.

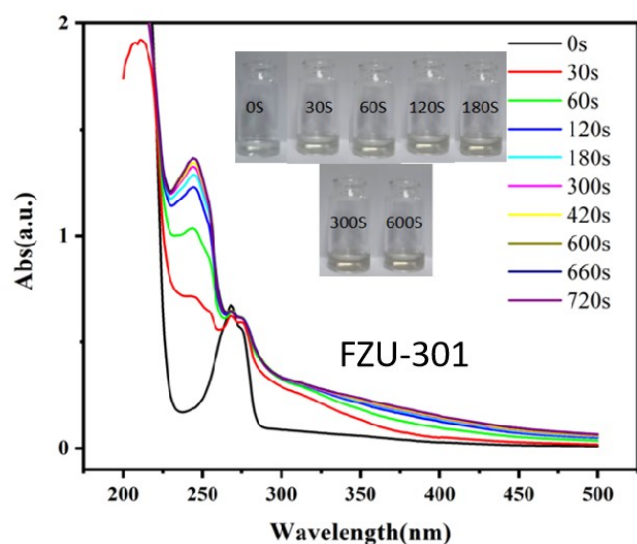

**Figure S37.** In-situ UV-vis spectra of waste water containing phenol (10 mg/L) degraded with the as-synthesized  $H_2O_2$  solution that photocatalyzed by FZU-301.

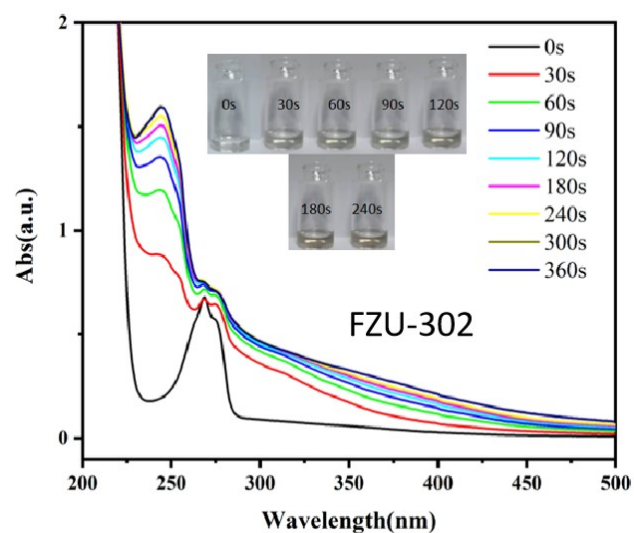

**Figure S38.** In-situ UV-vis spectra of waste water containing phenol (10 mg/L) degraded with the as-synthesized  $H_2O_2$  solution that photocatalyzed by FZU-302.

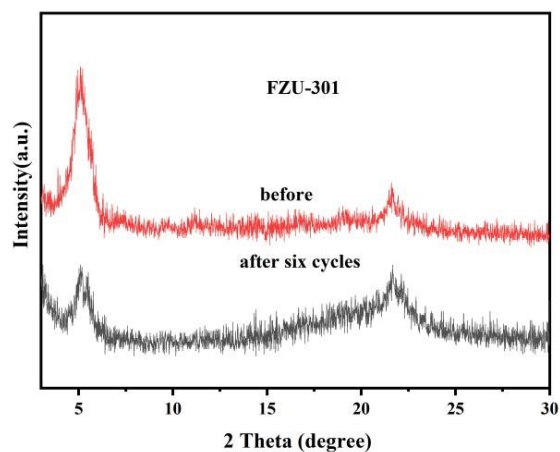

**Figure S39.** PXRD patterns of FZU-301 before and after photocatalytic reactions.

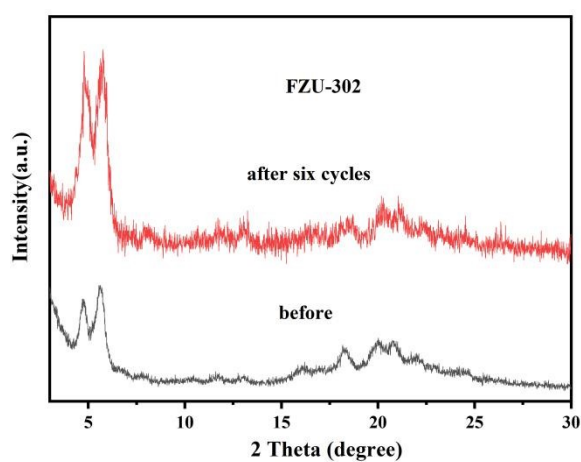

**Figure S40.** PXRD patterns of FZU-302 before and after photocatalytic reactions.

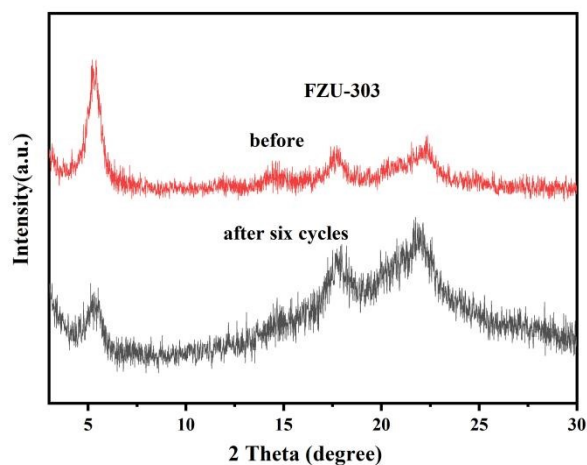

**Figure S41.** PXRD patterns of FZU-303 before and after photocatalytic reactions.

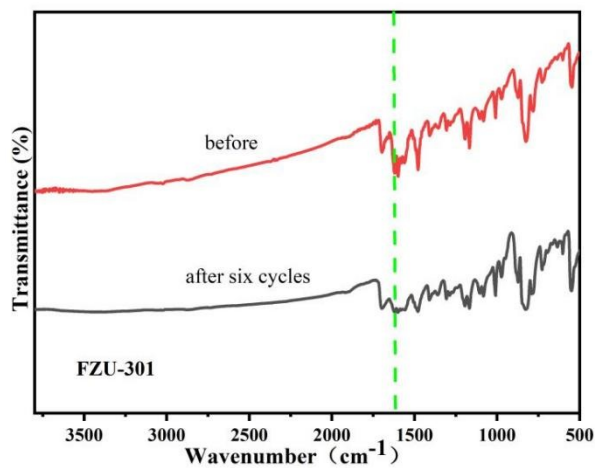

**Figure S42.** FT-IR patterns of FZU-301 before and after photocatalytic reactions.

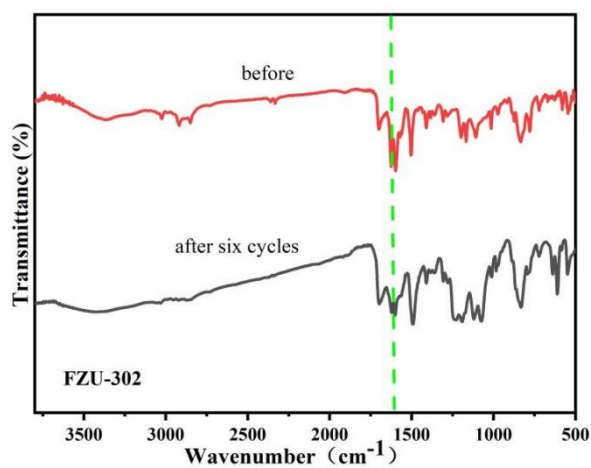

**Figure S43.** FT-IR patterns of FZU-302 before and after photocatalytic reactions.

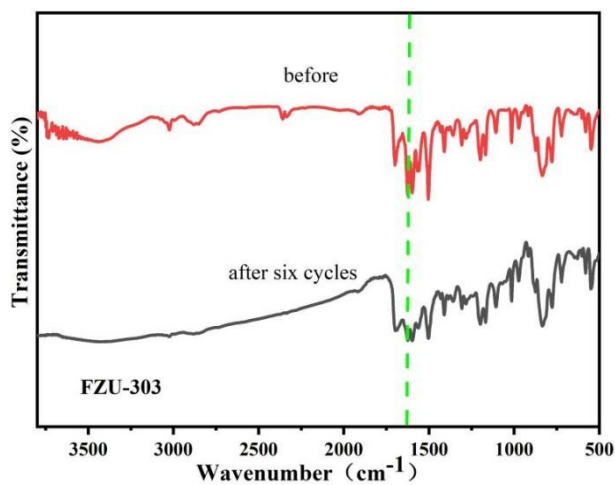

**Figure S44.** FT-IR patterns of FZU-303 before and after photocatalytic reactions.

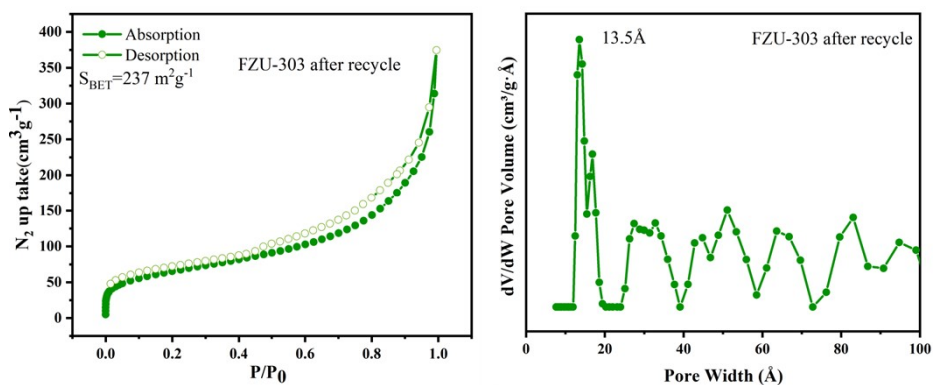

**Figure S45.** BET of FZU-303 after photocatalytic reactions.

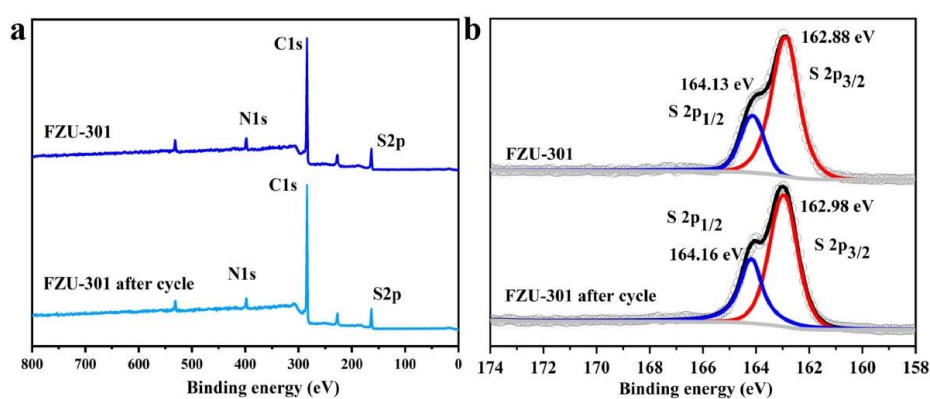

**Figure S46.** The XPS spectra of FZU-301 before and after the cycle (a) the total form and (b) the S 2p fine spectrum.

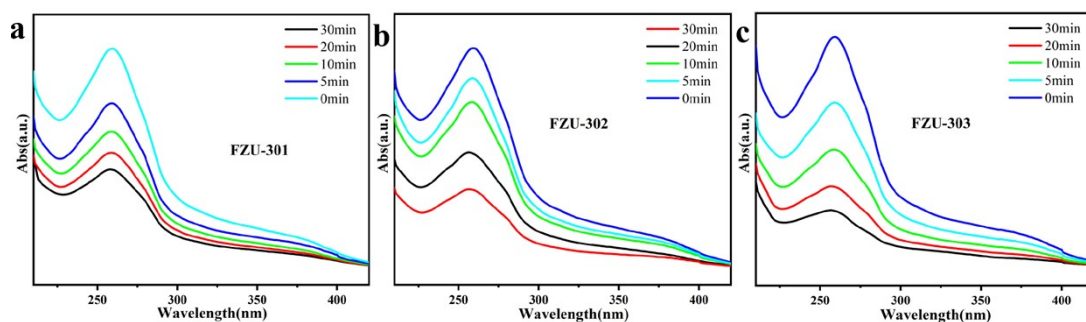

**Figure S47.** The photocatalytic experiment of  $\cdot\text{O}_2^-$  on COFs detected by NBT method.

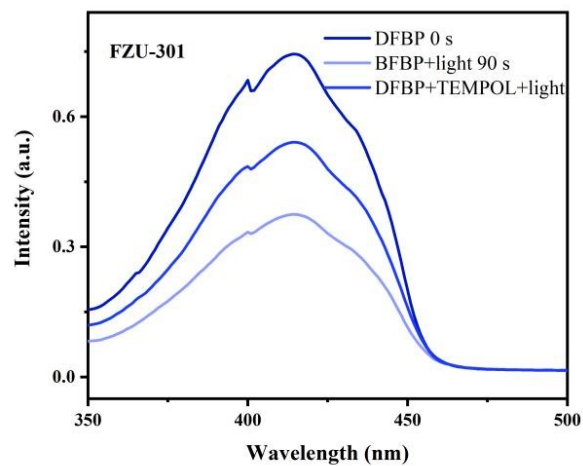

**Figure S48.** The photocatalytic experiment of  $^1\text{O}_2$  on FZU-301 detected by DPBF method.

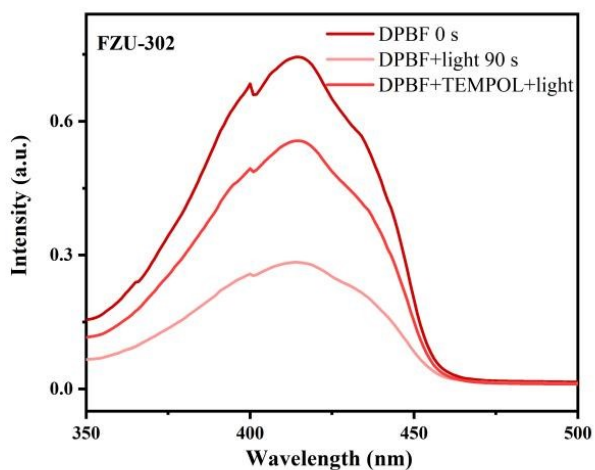

**Figure S49.** The photocatalytic experiment of  $^1\text{O}_2$  on FZU-302 detected by DPBF method.

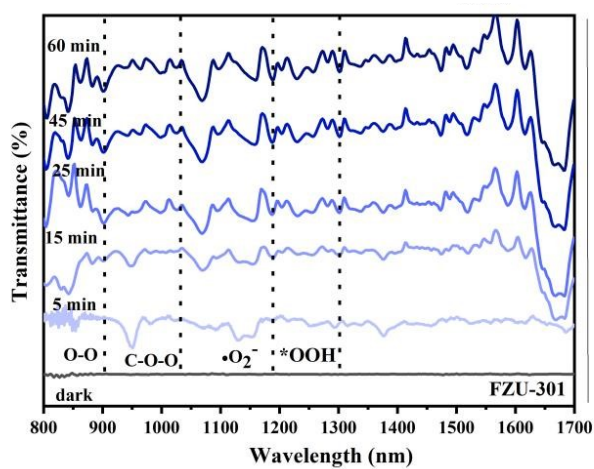

**Figure S50.** The in-situ DRIFT spectra of FZU-301.

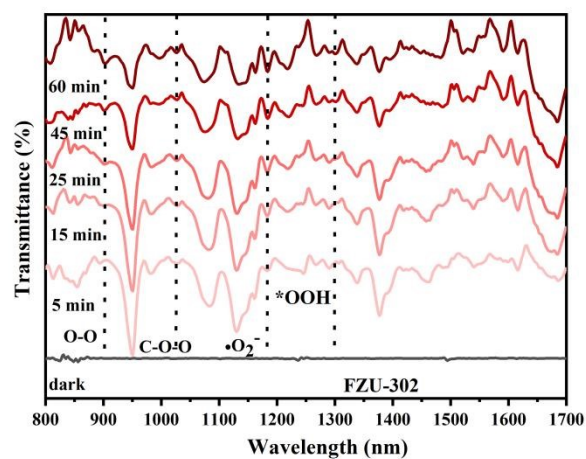

**Figure S51.** The in-situ DRIFT spectra of FZU-302.

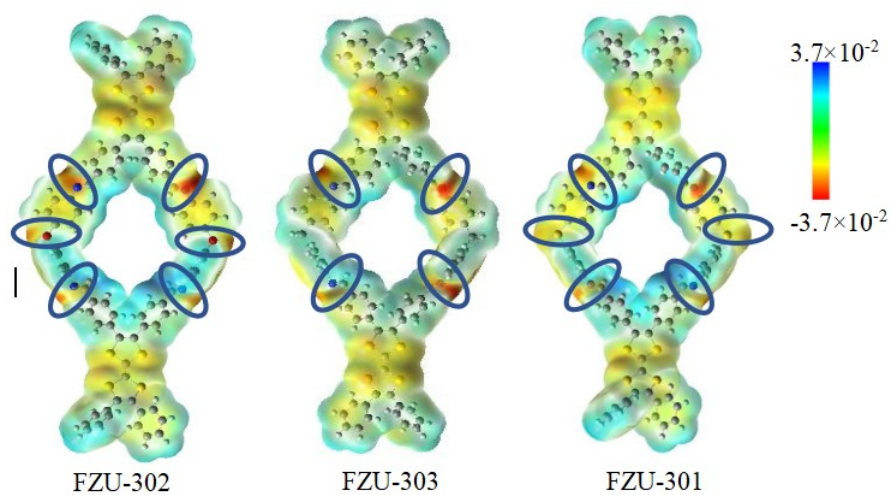

**Figure S52.** The ESP surface maps for optimized structures of FZU-301、FZU-302 and FZU-303.

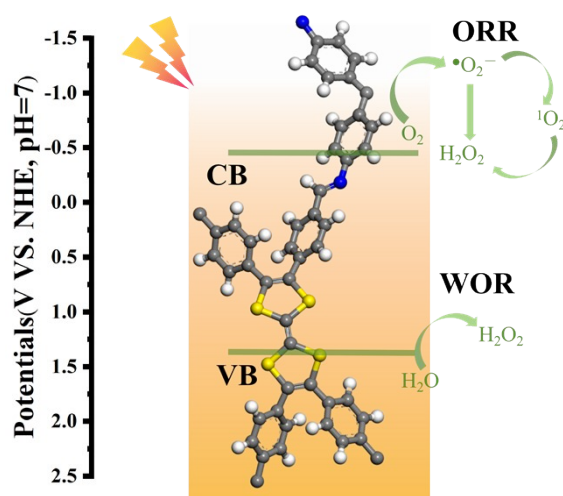

**Figure S53.** FZU-303 photocatalysis mechanism diagram.

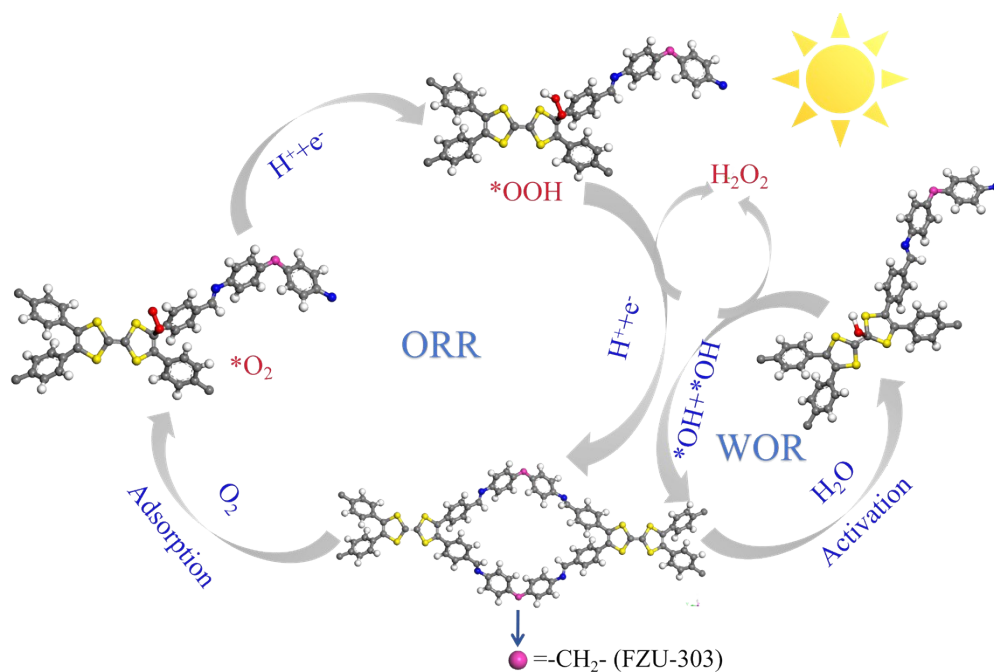

**Figure S54.** Proposed mechanism of H<sub>2</sub>O<sub>2</sub> photosynthesis process on FZU-303.

**Table S1.** Fitted parameters and average lifetimes of fs-TAS.

| Photocatalyst | $\tau_1$ (ps)           | $\tau_2$ (ps)           | $\tau_{ave}$ (ps) |
|---------------|-------------------------|-------------------------|-------------------|
| FZU-302       | 1.40                    | 47.21                   | 45.56             |
|               | R <sub>1</sub> : 2.88%  | R <sub>2</sub> : 97.12% |                   |
| FZU-303       | 1.33                    | 86.35                   | 84.80             |
|               | R <sub>1</sub> : 1.52%  | R <sub>2</sub> : 98.48% |                   |
| FZU-301       | 1.78                    | 35.76                   | 36.63             |
|               | R <sub>1</sub> : 4.74 % | R <sub>2</sub> : 95.26% |                   |

$$\tau_{ave} = (R_1 \times \tau_1^2 + R_2 \times \tau_2^2) / (R_1 \times \tau_1 + R_2 \times \tau_2).$$

**Table S2.** Comparison of photocatalytic H<sub>2</sub>O<sub>2</sub> production performance of FZU-303 with reported COF photocatalysts.

| Photocatalyst             | SCC   | AQY (at 420 nm) | Light source  | H <sub>2</sub> O <sub>2</sub> yield (umol·g <sup>-1</sup> ·h <sup>-1</sup> ) | Solvent(s)                             | Ref.                                              |
|---------------------------|-------|-----------------|---------------|------------------------------------------------------------------------------|----------------------------------------|---------------------------------------------------|
| DMAP-BNCOFs               | 0.58% | 8.3%            | λ>420 nm      | 8051.4                                                                       | H <sub>2</sub> O                       | <i>J. Am. Chem. Soc.</i> 2025, 147, 24050-24059   |
| iTPPy-COF                 | 0.65% | 8.3%            | λ>420 nm      | 7955                                                                         | H <sub>2</sub> O                       | <i>Angew. Chem. Int. Ed.</i> 2025, 64, e202425617 |
| BDT-BTT-COF               | \     | 2.0%            | λ>420 nm      | 25670                                                                        | BnAm/Aceto nitrile                     | <i>Adv. Funct. Mater.</i> 2026; 0:e32122          |
| BDT-BT-COF                | \     | \               |               | 16920                                                                        |                                        |                                                   |
| STT COF                   | \     | 40%             | λ >320 nm     | 14356.5                                                                      | H <sub>2</sub> O                       | <i>Nat. Commun.</i> , 2025, 161, 8941             |
| H <sub>z</sub> -TP-BT-COF | \     | 15.35%          | λ >300 nm     | 12500                                                                        | H <sub>2</sub> O                       | <i>Nat. Catal.</i> , 2024, 72, 195-206            |
| TpAP[5]                   | 0.09% | 1.11%           | λ>420 nm      | 2343                                                                         | H <sub>2</sub> O/EtOH (9/1)            | <i>J. Am. Chem. Soc.</i> 2025, 147, 13618         |
| TF <sub>50</sub> -COF     | 0.17% | 5.2% at 400 nm  | λ>400 nm      | 1739                                                                         | H <sub>2</sub> O: EtOH (9/1)           | <i>Angew. Chem. Int. Ed.</i> 2022, 61, e202202328 |
| DVA-COF                   | 0.08% | 2.84%           | 420 nm LED    | 8450                                                                         | H <sub>2</sub> O/benzyl alcohol (9/1)  | <i>Angew. Chem. Int. Ed.</i> 2024, 63, e202402297 |
| Py-Da-COF                 | 0.09% | 5.4%            | λ>420 nm      | 1242                                                                         | H <sub>2</sub> O/benzyl alcohol (9/1)  | <i>Angew. Chem. Int. Ed.</i> 2023, 62, e202216719 |
| DMCR-1NH                  | \     | 10.0%           | λ=420 -700nm  | 2118                                                                         | H <sub>2</sub> O/benzyl alcohol (10/1) | <i>J. Am. Chem. Soc.</i> 2023, 145, 2975          |
| sono-COF-F2               | \     | 4.8%            | λ>420 nm      | 414.6                                                                        | H <sub>2</sub> O/benzyl alcohol (1/9)  | <i>J. Am. Chem. Soc.</i> 2022, 144, 9902          |
| TAPT-FTPB COFs            | 1.22% | \               | AM 1.5G       | 3780                                                                         | H <sub>2</sub> O                       | <i>Nat. Synth.</i> , 2025, 4, 134                 |
| B[f]QCOF-1                | 0.23% | 5.2% at 450 nm  | λ>420 nm      | 9025                                                                         | H <sub>2</sub> O                       | <i>Nat. Commun.</i> 2025, 16, 3493                |
| THB-COF                   | 0.16% | 2.11%           | λ > 420 nm    | 1366                                                                         | H <sub>2</sub> O                       | <i>Adv. Funct. Mater.</i> 2025, e12475            |
| THT-COF                   | 0.45% | 6.50%           |               | 5455                                                                         |                                        |                                                   |
| HHT-COF                   | 0.62% | 8.77%           |               | 6432                                                                         |                                        |                                                   |
| β-TT-TDAN COF             | 1.35% | 19.20%          | λ>420 nm      | 3424                                                                         | H <sub>2</sub> O                       | <i>Adv. Mater.</i> 2025, 37, 2500913              |
| TAA-CTP-COF               | \     | \               | Full spectrum | 502                                                                          | H <sub>2</sub> O                       | <i>ACS Catal.</i> 2024, 14, 3778                  |
| FS-OHOMe-COF              | 0.58% | 9.6%            | λ>420 nm      | 2200                                                                         | H <sub>2</sub> O                       | <i>Angew. Chem. Int. Ed.</i> 2024, 63, e202403926 |
| HEP-TAPT-COF              | 0.65% | 15.35%          | λ>420 nm      | 1750                                                                         | H <sub>2</sub> O                       | <i>Angew. Chem. Int. Ed.</i> 2023, 62, e202217479 |
| TTF-BT-COF                | 0.49% | 11.19%          | λ>420 nm      | 2760                                                                         | H <sub>2</sub> O                       | <i>Angew. Chem. Int. Ed.</i> 2023, 62, e202218868 |

|                                       |       |                    |                            |             |                       |                                                      |
|---------------------------------------|-------|--------------------|----------------------------|-------------|-----------------------|------------------------------------------------------|
| Bpt-CTF                               | 0.2%  | 8.7%               | $\lambda=350-780\text{nm}$ | 3268.1      | H <sub>2</sub> O      | <i>Adv. Mater.</i> 2022, 34, 2110266                 |
| TD-COF                                | 0.15% | \                  | white LED<br>(400-700 nm)  | 3364        | H <sub>2</sub> O      | <i>Angew. Chem. Int. Ed.</i><br>2023, 62, e202309624 |
| TT-COF                                | \     | \                  |                            | 2890        |                       |                                                      |
| SO <sub>3</sub> H-COF                 | 0.40% | 8.6%               | $\lambda>400\text{ nm}$    | 3015        | H <sub>2</sub> O      | <i>Angew. Chem. Int. Ed.</i><br>2024, 63, e202404077 |
| COF-BD2                               | 0.68% | 18.4%<br>at 400 nm | $\lambda>420\text{ nm}$    | 5211        | H <sub>2</sub> O      | <i>Angew. Chem. Int. Ed.</i><br>2025, e202505621     |
| TFBP-DHBD COF                         | \     | \                  | $\lambda>420\text{ nm}$    | 1444        | H <sub>2</sub> O      | <i>Adv. Mater.</i> 2025,<br>2502990                  |
| PD <sup>2+</sup> -COF <sub>16.7</sub> | 0.34% | 12.9%              | $\lambda>400\text{ nm}$    | 1732        | H <sub>2</sub> O      | <i>Angew. Chem. Int. Ed.</i> 2023, 62, e202315456    |
| COF-N <sub>32</sub>                   | 0.31% | 6.2%<br>at 459 nm  | $\lambda>420\text{ nm}$    | 605         | H <sub>2</sub> O      | <i>Nat Commun</i> 14, 4344<br>(2023)                 |
| TZ-COF                                | 0.04% | \                  | $\lambda>420\text{ nm}$    | 268         | H <sub>2</sub> O      | <i>Angew. Chem. Int. Ed.</i><br>2023, 62, e202309480 |
| CTF-BDDBN                             | 0.14% | \                  | $\lambda>420\text{ nm}$    | 887         | H <sub>2</sub> O      | <i>Adv. Mater.</i> 2020, 32,<br>e1904433.            |
| Pz-COF                                | 0.65% | 7.83%              | $\lambda>420\text{ nm}$    | 7631        | H <sub>2</sub> O      | <i>Angew. Chem. Int. Ed.</i><br>2025, e20491         |
| COF-TfpBpy                            | 0.57% | 8.1%               | $\lambda>420\text{ nm}$    | 2084        | H <sub>2</sub> O      | <i>Angew. Chem. Int. Ed.</i><br>2022, 61, e202200413 |
| PyIm-COF                              | 0.25% | 3.7%               | $\lambda>420\text{ nm}$    | 5850        | H <sub>2</sub> O      | <i>Angew. Chem. Int. Ed.</i><br>2024, 63, e202404563 |
| TACOF-1-COOH                          | 0.55% | 5.7%               | $\lambda>420\text{ nm}$    | 3542        | H <sub>2</sub> O      | <i>Angew. Chem. Int. Ed.</i><br>2024, 63, e202408802 |
| DQTb-COFs                             | 0.21% | 2.1%               | $\lambda>400\text{ nm}$    | 1844        | H <sub>2</sub> O      | <i>Chem. Eng. J.</i> 2024, 481,<br>148494            |
| Py-Da-COF                             | 0.09% | 4.5%               | $\lambda>420\text{ nm}$    | 461         | H <sub>2</sub> O      | <i>Angew. Chem. Int. Ed.</i><br>2023, 62, e202216719 |
| ECUT-COF-50                           | 0.52% | 9.1%<br>at 400 nm  | $\lambda>400\text{ nm}$    | 2448        | H <sub>2</sub> O      | <i>Angew. Chem. Int. Ed.</i> 20<br>24, e202414658    |
| ECUT-COF-50                           | 0.68% | 11.2%<br>at 400 nm |                            | 4742        |                       |                                                      |
| Bpy-TAPT                              | 0.65% | 8.6%               | $\lambda>420\text{ nm}$    | 4038        | H <sub>2</sub> O      | <i>Appl. Catal. B-Environ.</i><br>2020, 272, 118970  |
| COF-2CN                               | 0.6%  | 6.8%               | $\lambda>420\text{ nm}$    | 1601        | H <sub>2</sub> O      | <i>Angew. Chem. Int. Ed.</i><br>2024, 63, e202318562 |
| FS-COFs                               | \     | 6.21%              | $\lambda>420\text{ nm}$    | 3904.2      | H <sub>2</sub> O      | <i>Angew. Chem. Int. Ed.</i><br>2023, 62, e202305355 |
| <b>FZU-303</b>                        | 0.95% | 7.4%               | $\lambda>420\text{ nm}$    | <b>4642</b> | <b>H<sub>2</sub>O</b> | <b>This work</b>                                     |

**Table S3.** Comparison of exciton binding energy and H<sub>2</sub>O<sub>2</sub> production of 1D COFs with other reported COFs photocatalysts.

| COF           | Exciton binding energy (emV) | H <sub>2</sub> O <sub>2</sub> Photocatalytic performance (umolg <sup>-1</sup> h <sup>-1</sup> ) | Ref                                        |
|---------------|------------------------------|-------------------------------------------------------------------------------------------------|--------------------------------------------|
| COF-2CN       | 67.6                         | 1601                                                                                            | Angew. Chem. Int. Ed. 2024, 63, e202318562 |
| COF-1CN       | 79.3                         | 573                                                                                             |                                            |
| COF-0CN       | 86.2                         | 194                                                                                             |                                            |
| BTBpy         | 44.2                         | 441                                                                                             | Nat Commun 16, 7432 (2025)                 |
| COF-OUT-1     | 53.9                         | 983                                                                                             | Angew. Chem. Int. Ed. 2025, 64, e202510293 |
| COF-OUT-2     | 49.6                         | 2351                                                                                            |                                            |
| COF-1N-1      | 36.4                         | 5463                                                                                            |                                            |
| ECUT-COF-50   | 32.4                         | 4742                                                                                            | Angew. Chem. Int. Ed. 2024, e202414658     |
| ECUT-COF-51   | 89.1                         | 2448                                                                                            |                                            |
| FS-OHOMe-COF  | 65.8                         | 1480                                                                                            | Angew. Chem. Int. Ed. 2024, 63, e202403926 |
| FS-OH-COF     | 113.3                        | 780                                                                                             |                                            |
| FS-OMe-COF    | 72.9                         | 1150                                                                                            |                                            |
| TMB-COF-4     | 44.7                         | 5106                                                                                            | Angew. Chem. Int. Ed. 2024, 64, e202412890 |
| TMB-COF-3     | 52.4                         | 2621                                                                                            |                                            |
| TMB-COF-2     | 65.6                         | 1293                                                                                            |                                            |
| TMB-COF-1     | 67.1                         | 218                                                                                             |                                            |
| BBT CAN COF-1 | 36.2                         | 2500                                                                                            | Adv. Funct. Mater. 2025, 2424035           |
| BBT CAN COF-2 | 149                          | 910                                                                                             |                                            |
| FZU-303       | 33.4                         | 4642                                                                                            | This Work                                  |
| FZU-302       | 44.6                         | 1547                                                                                            |                                            |
| FZU-301       | 48.8                         | 1032                                                                                            |                                            |

**Table S4.** Fractional atomic coordinates for the unit cell of FZU-301 with AA stacking.

| Space group: P2                                                            |        |        |         |
|----------------------------------------------------------------------------|--------|--------|---------|
| a = 24.834    b = 4.767    c = 26.371 $\alpha = \beta = \gamma = 90^\circ$ |        |        |         |
| Atom                                                                       | x      | y      | z       |
| C1                                                                         | -5.579 | -1.815 | -19.784 |
| C2                                                                         | -6.931 | -1.819 | -19.801 |
| S3                                                                         | -4.642 | -1.79  | -18.24  |
| C4                                                                         | -3.106 | -1.336 | -19.07  |
| C5                                                                         | -3.088 | -1.323 | -20.423 |
| S6                                                                         | -4.612 | -1.717 | -21.304 |
| S7                                                                         | -7.864 | -1.749 | -21.346 |
| C8                                                                         | -9.397 | -1.301 | -20.508 |
| C9                                                                         | -9.42  | -1.331 | -19.155 |
| S10                                                                        | -7.904 | -1.779 | -18.282 |

|     |         |        |         |
|-----|---------|--------|---------|
| C11 | -10.61  | -1.023 | -18.315 |
| C12 | -10.523 | -0.834 | -21.362 |
| C13 | -1.967  | -0.91  | -18.212 |
| C14 | -1.897  | -1.007 | -21.257 |
| C15 | -11.88  | -1.536 | -18.626 |
| C16 | -12.982 | -1.252 | -17.824 |
| C17 | -12.844 | -0.449 | -16.686 |
| C18 | -11.581 | 0.068  | -16.362 |
| C19 | -10.471 | -0.22  | -17.168 |
| C20 | -10.827 | -1.48  | -22.574 |
| C21 | -11.914 | -1.056 | -23.355 |
| C22 | -12.688 | 0.044  | -22.951 |
| C23 | -12.364 | 0.702  | -21.759 |
| C24 | -11.269 | 0.292  | -20.998 |
| C25 | -1.209  | 0.215  | -18.55  |
| C26 | -0.098  | 0.586  | -17.794 |
| C27 | 0.23    | -0.112 | -16.625 |
| C28 | -0.558  | -1.211 | -16.245 |
| C29 | -1.659  | -1.597 | -17.025 |
| C30 | -2.025  | -0.151 | -22.367 |
| C31 | -0.913  | 0.146  | -23.167 |
| C32 | 0.339   | -0.415 | -22.875 |
| C33 | 0.465   | -1.271 | -21.774 |
| C34 | -0.638  | -1.563 | -20.977 |
| C35 | -14.035 | -0.189 | -15.86  |
| C36 | -13.809 | 0.56   | -23.763 |
| C37 | 1.363   | 0.366  | -15.808 |
| C38 | 1.534   | -0.14  | -23.691 |
| S39 | -18.715 | 1.602  | -28.562 |
| C40 | -20.092 | 1.267  | -27.428 |
| C41 | -17.353 | 1.154  | -27.454 |
| C42 | -21.266 | 2.024  | -27.519 |
| C43 | -22.332 | 1.786  | -26.637 |
| C44 | -22.245 | 0.771  | -25.675 |
| C45 | -21.086 | -0.027 | -25.634 |
| C46 | -20.028 | 0.217  | -26.506 |
| C47 | -17.238 | 1.749  | -26.193 |
| C48 | -16.205 | 1.38   | -25.327 |
| C49 | -15.267 | 0.4    | -25.713 |
| C50 | -15.4   | -0.201 | -26.971 |
| C51 | -16.423 | 0.188  | -27.847 |
| N52 | -23.362 | 0.538  | -24.8   |
| N53 | -14.192 | -0.032 | -24.857 |

|     |         |        |         |
|-----|---------|--------|---------|
| S54 | -18.623 | 1.295  | -10.925 |
| C55 | -19.964 | 0.864  | -12.068 |
| C56 | -17.236 | 1.018  | -12.062 |
| C57 | -20.886 | -0.124 | -11.719 |
| C58 | -21.897 | -0.495 | -12.618 |
| C59 | -22.021 | 0.144  | -13.857 |
| C60 | -21.084 | 1.138  | -14.205 |
| C61 | -20.066 | 1.49   | -13.315 |
| C62 | -17.272 | -0.019 | -12.999 |
| C63 | -16.212 | -0.216 | -13.88  |
| C64 | -15.08  | 0.619  | -13.832 |
| C65 | -15.017 | 1.619  | -12.853 |
| C66 | -16.087 | 1.811  | -11.964 |
| N67 | -23.095 | -0.258 | -14.73  |
| N68 | -13.963 | 0.429  | -14.718 |

**Table S5.** Fractional atomic coordinates for the unit cell of FZU-302 with AA stacking.

| Space group: P2                                                            |        |       |        |
|----------------------------------------------------------------------------|--------|-------|--------|
| a = 25.811    b = 4.310    c = 28.768 $\alpha = \beta = \gamma = 90^\circ$ |        |       |        |
| C1                                                                         | 6.201  | 4.202 | 22.036 |
| C2                                                                         | 7.539  | 4.3   | 22.104 |
| S3                                                                         | 5.301  | 4.34  | 20.478 |
| C4                                                                         | 3.689  | 4.148 | 21.243 |
| C5                                                                         | 3.625  | 4.057 | 22.596 |
| S6                                                                         | 5.183  | 3.9   | 23.493 |
| S7                                                                         | 8.457  | 4.273 | 23.647 |
| C8                                                                         | 10.073 | 4.343 | 22.818 |
| C9                                                                         | 10.095 | 4.351 | 21.454 |
| S10                                                                        | 8.525  | 4.495 | 20.611 |
| C11                                                                        | 11.289 | 4.148 | 20.556 |
| C12                                                                        | 11.257 | 4.52  | 23.707 |
| C13                                                                        | 2.54   | 4.326 | 20.316 |
| C14                                                                        | 2.376  | 4.028 | 23.438 |
| C15                                                                        | 1.484  | 5.14  | 20.684 |
| C16                                                                        | 0.411  | 5.39  | 19.852 |
| C17                                                                        | 0.386  | 4.863 | 18.56  |
| C18                                                                        | 1.463  | 4.053 | 18.14  |
| C19                                                                        | 2.529  | 3.77  | 19.026 |
| C20                                                                        | 1.215  | 3.365 | 23.033 |
| C21                                                                        | 0.145  | 3.166 | 23.895 |

|     |        |       |        |
|-----|--------|-------|--------|
| C22 | 0.116  | 3.782 | 25.144 |
| C23 | 1.203  | 4.592 | 25.514 |
| C24 | 2.339  | 4.683 | 24.679 |
| C25 | 11.297 | 4.609 | 19.224 |
| C26 | 12.387 | 4.36  | 18.377 |
| C27 | 13.494 | 3.645 | 18.848 |
| C28 | 13.488 | 3.17  | 20.161 |
| C29 | 12.397 | 3.419 | 20.982 |
| C30 | 11.255 | 4.025 | 25.024 |
| C31 | 12.34  | 4.277 | 25.874 |
| C32 | 13.411 | 5.053 | 25.419 |
| C33 | 13.424 | 5.529 | 24.118 |
| C34 | 12.374 | 5.243 | 23.278 |
| C35 | -0.808 | 5.162 | 17.735 |
| C36 | 14.665 | 3.4   | 18.001 |
| C37 | 14.594 | 5.276 | 26.22  |
| C38 | -1.069 | 3.556 | 26.002 |
| O39 | 19.64  | 4.286 | 30.08  |
| C40 | 20.872 | 4.174 | 29.382 |
| C41 | 18.472 | 4.319 | 29.313 |
| C42 | 21.932 | 5.02  | 29.732 |
| C43 | 23.095 | 5.092 | 28.938 |
| C44 | 23.243 | 4.261 | 27.811 |
| C45 | 22.166 | 3.426 | 27.457 |
| C46 | 21.02  | 3.362 | 28.254 |
| C47 | 18.42  | 4.918 | 28.058 |
| C48 | 17.208 | 5.086 | 27.432 |
| C49 | 16.03  | 4.571 | 28.008 |
| C50 | 16.102 | 3.894 | 29.231 |
| C51 | 17.316 | 3.848 | 29.911 |
| N52 | 24.425 | 4.359 | 26.983 |
| N53 | 14.795 | 4.594 | 27.302 |
| O54 | 19.663 | 4.345 | 13.997 |
| C55 | 20.9   | 4.483 | 14.692 |
| C56 | 18.464 | 4.151 | 14.712 |
| C57 | 22.051 | 3.984 | 14.065 |
| C58 | 23.31  | 4.014 | 14.685 |
| C59 | 23.448 | 4.62  | 15.941 |
| C60 | 22.304 | 5.202 | 16.54  |
| C61 | 21.053 | 5.152 | 15.916 |
| C62 | 18.445 | 3.61  | 15.999 |
| C63 | 17.268 | 3.561 | 16.72  |
| C64 | 16.065 | 4.014 | 16.141 |

|     |        |       |        |
|-----|--------|-------|--------|
| C65 | 16.062 | 4.459 | 14.81  |
| C66 | 17.264 | 4.496 | 14.095 |
| N67 | 24.718 | 4.543 | 16.622 |
| N68 | 14.854 | 4.071 | 16.904 |

**TableS6.** Fractional atomic coordinates for the unit cell of FZU-303 with AA stacking.

| Space group: P2                                                            |        |       |        |
|----------------------------------------------------------------------------|--------|-------|--------|
| a = 25.753    b = 4.625    c = 24.876 $\alpha = \beta = \gamma = 90^\circ$ |        |       |        |
| C1                                                                         | 5.749  | 6.556 | 18.662 |
| C2                                                                         | 7.12   | 6.557 | 18.651 |
| S3                                                                         | 4.776  | 6.569 | 17.122 |
| C4                                                                         | 3.31   | 5.898 | 17.946 |
| C5                                                                         | 3.346  | 5.787 | 19.305 |
| S6                                                                         | 4.861  | 6.248 | 20.198 |
| S7                                                                         | 8.092  | 6.57  | 20.192 |
| C8                                                                         | 9.559  | 5.9   | 19.367 |
| C9                                                                         | 9.523  | 5.788 | 18.009 |
| S10                                                                        | 8.007  | 6.249 | 17.116 |
| C11                                                                        | 10.669 | 5.297 | 17.198 |
| C12                                                                        | 10.744 | 5.561 | 20.229 |
| C13                                                                        | 2.125  | 5.559 | 17.084 |
| C14                                                                        | 2.2    | 5.296 | 20.116 |
| C15                                                                        | 0.885  | 6.168 | 17.288 |
| C16                                                                        | -0.181 | 5.966 | 16.419 |
| C17                                                                        | -0.091 | 5.043 | 15.379 |
| C18                                                                        | 1.105  | 4.337 | 15.222 |
| C19                                                                        | 2.223  | 4.64  | 16.025 |
| C20                                                                        | 1.497  | 4.173 | 19.714 |
| C21                                                                        | 0.297  | 3.809 | 20.335 |
| C22                                                                        | -0.168 | 4.5   | 21.453 |
| C23                                                                        | 0.607  | 5.564 | 21.94  |
| C24                                                                        | 1.792  | 5.943 | 21.287 |
| C25                                                                        | 11.076 | 5.944 | 16.027 |
| C26                                                                        | 12.261 | 5.564 | 15.374 |
| C27                                                                        | 13.035 | 4.5   | 15.86  |
| C28                                                                        | 12.57  | 3.809 | 16.978 |

|     |        |       |        |
|-----|--------|-------|--------|
| C29 | 11.372 | 4.174 | 17.6   |
| C30 | 10.646 | 4.641 | 21.288 |
| C31 | 11.764 | 4.338 | 22.091 |
| C32 | 12.959 | 5.045 | 21.936 |
| C33 | 13.049 | 5.969 | 20.896 |
| C34 | 11.984 | 6.17  | 20.026 |
| C35 | -1.239 | 4.898 | 14.464 |
| C36 | 14.285 | 4.043 | 15.201 |
| C37 | 14.107 | 4.9   | 22.852 |
| C38 | -1.418 | 4.043 | 22.111 |
| C39 | 19.362 | 3.17  | 26.506 |
| C40 | 20.604 | 3.488 | 25.694 |
| C41 | 18.06  | 3.361 | 25.722 |
| C42 | 21.543 | 4.433 | 26.128 |
| C43 | 22.609 | 4.802 | 25.288 |
| C44 | 22.801 | 4.182 | 24.038 |
| C45 | 21.903 | 3.169 | 23.653 |
| C46 | 20.831 | 2.828 | 24.483 |
| C47 | 17.959 | 4.3   | 24.686 |
| C48 | 16.803 | 4.402 | 23.909 |
| C49 | 15.67  | 3.608 | 24.175 |
| C50 | 15.774 | 2.645 | 25.2   |
| C51 | 16.94  | 2.555 | 25.991 |
| N52 | 23.928 | 4.578 | 23.227 |
| N53 | 14.442 | 3.768 | 23.408 |
| C54 | 19.258 | 3.169 | 10.809 |
| C55 | 20.56  | 3.36  | 11.592 |
| C56 | 18.016 | 3.488 | 11.62  |
| C57 | 21.681 | 2.554 | 11.323 |
| C58 | 22.847 | 2.644 | 12.114 |
| C59 | 22.951 | 3.606 | 13.139 |
| C60 | 21.818 | 4.4   | 13.405 |
| C61 | 20.662 | 4.299 | 12.628 |
| C62 | 17.79  | 2.829 | 12.832 |
| C63 | 16.718 | 3.169 | 13.661 |
| C64 | 15.82  | 4.183 | 13.275 |
| C65 | 16.012 | 4.803 | 12.026 |
| C66 | 17.077 | 4.433 | 11.186 |
| N67 | 24.179 | 3.766 | 13.905 |
| N68 | 14.694 | 4.579 | 14.087 |

## References

- [1] K. Lin, J. Wang, S. Qiao, Z. Guo, *ACS Sustainable Chemistry & Engineering*. **2024**, 12, 6719-6727.
- [2] J. N. Chang, Q. Li, J. W. Shi, M. Zhang, L. Zhang, S. Li, Y. Chen, S. L. Li, Y. Q. Lan, *Angewandte Chemie International Edition*. **2023**, 62, 202218868.
- [3] J. Y. Yue, J. X. Luo, Z. X. Pan, R. Z. Zhang, P. Yang, Q. Xu, B. Tang, *Angewandte Chemie International Edition*. **2024**, 63, 5202405763.
- [4] J.-Y. Yue, L.-P. Song, Z.-X. Pan, M. Cheng, X. Wang, Q. Xu, P. Yang, *Chemical Engineering Journal*. **2025**, 504, 158983.
- [5] X. Ma, S. Li, Y. Gao, N. Li, Y. Han, H. Pan, Y. Bian, J. Jiang, *Advanced Functional Materials*. **2024**, 34, 2409913.
- [6] G. Kresse, J. Hafner, Ab initio molecular dynamics for liquid metals. *Physical Review B*. **1993**, 47, 558-561.
- [7] G. Kresse, J. Furthmüller, Efficiency of ab-initio total energy calculations for metals and semiconductors using a plane-wave basis set. *Computational Materials Science*. **1996**, 6, 15-50.
- [8] J. P. Perdew, K. Burke, M. Ernzerhof, Generalized Gradient Approximation Made Simple, *Physical Review Letters*. **1996**, 77, 3865-3868.
- [9] P. E. Blöchl, Projector augmented-wave method. *Physical Review B*. **1994**, 50, 17953-17979.
- [10] S. Grimme, Semiempirical GGA-type density functional constructed with a long-range dispersion correction, *Journal of Computational Chemistry*. **2006**, 27, 1787–1799.
- [11] G. Henkelman, A. Arnaldsson, and H. Jónsson, A fast and robust algorithm for Bader decomposition of charge density, *Computational Materials Science*. **2006**, 36, 354-360.
